1 Potential and action mechanism of favipiravir as an antiviral against Junin virus

2

3 Vahid Rajabali Zadeh<sup>1</sup>, Shuzo Urata<sup>2</sup>, Tosin Oladipo Afowowe<sup>1,3</sup>, and Jiro Yasuda<sup>1,2,3\*</sup>

4

5 <sup>1</sup> Department of Emerging Infectious Diseases, Institute of Tropical Medicine, Nagasaki  
6 University, Nagasaki, Japan.

7 <sup>2</sup> National Research Center for the Control and Prevention of Infectious Diseases, Nagasaki  
8 University, Nagasaki, Japan.

9 <sup>3</sup> Program for Nurturing Global Leaders in Tropical and Emerging Communicable Diseases,  
10 Graduate School of Biomedical Sciences, Nagasaki University, Nagasaki, Japan.

11

12 \*Corresponding author: Jiro Yasuda, [j-yasuda@nagasaki-u.ac.jp](mailto:j-yasuda@nagasaki-u.ac.jp)

13

14 **KEY WORDS**

15 arenavirus, favipiravir, Junin virus, Argentine hemorrhagic fever, resistance

16

17 **ABBREVIATIONS:** JUNV, Junin virus; AHF, Argentine hemorrhagic fever; RdRp, RNA-  
18 dependent RNA polymerase; GPC, Glycoprotein precursor; VSV, vesicular stomatitis virus.

19 **ABSTRACT**

20 Favipiravir is a nucleoside analogue that inhibits the replication and transcription of a  
21 broad spectrum of RNA viruses, including pathogenic arenaviruses. In this study, we isolated  
22 a favipiravir-resistant mutant of Junin virus (JUNV), which is the causative agent of Argentine  
23 hemorrhagic fever, and analyzed the antiviral mechanism of favipiravir against JUNV. Two  
24 amino acid substitutions, N462D in the RNA-dependent RNA polymerase (RdRp) and A168T  
25 in the glycoprotein precursor GPC, were identified in the mutant. GPC-A168T substitution  
26 enhanced the efficiency of JUNV internalization, which explains the robust replication kinetics  
27 of the mutant in the virus growth analysis. Although RdRp-N462D substitution did not affect  
28 polymerase activity levels in a minigenome system, comparisons of RdRp error frequencies  
29 showed that the virus with RdRp-D462 possessed a significantly higher fidelity. We also  
30 provided experimental evidence for the first time that favipiravir inhibited JUNV through the  
31 accumulation of transition mutations, confirming its role as a purine analogue against  
32 arenaviruses. Moreover, we showed that treatment with a combination of favipiravir and either  
33 ribavirin or remdesivir inhibited JUNV replication in a synergistic manner, blocking the  
34 generation of the drug-resistant mutant. Our findings provide new insights for the clinical  
35 management and treatment of Argentine hemorrhagic fever.

36

## 37 INTRODUCTION

38 Argentine hemorrhagic fever (AHF) is a severe zoonotic disease caused by Junin virus  
39 (JUNV) and highly endemic in Argentina. In addition to the intense clinical course of the  
40 disease, the lack of approved therapeutics and preventive countermeasures against JUNV  
41 highlight its significant threat to global public health (NIAID Emerging Infectious  
42 Diseases/Pathogens; Borio et al., 2002; Enria et al., 2008). There are a few reports on an  
43 immune plasma therapy and a combinational, off-label use of ribavirin and favipiravir (Enria  
44 et al., 2008; Veliziotis et al., 2020). Although a live attenuated vaccine, Candid #1, was  
45 developed by the US Army Medical Research Institute of Infectious Diseases, it has been  
46 approved only for use in endemic areas due to concerns over its genomic stability (Gowen et  
47 al., 2021; McKee et al., 1993; Stephan et al., 2013).

48 Favipiravir (6-fluoro-3-hydroxy-2-pyrazinecarboxamide; also known as T-705 or  
49 Avigan) is a purine analogue originally developed as an antiviral agent for influenza and  
50 subsequently reported to inhibit the replication of a broad spectrum of RNA viruses (Delang et  
51 al., 2018). Favipiravir is a prodrug that is metabolized into its active form, ribofuranosyl 5'-  
52 triphosphate (favipiravir-RTP), upon cellular uptake, and thus acts as a pseudo-nucleotide that  
53 competes with endogenous guanine and adenine nucleotides, leading to the disruption of viral  
54 replication and transcription (Furuta et al., 2005; Goldhill et al., 2019). Given the extensive  
55 structural and functional similarities among RNA-dependent RNA polymerase (RdRp) of RNA  
56 viruses (Bruenn, 2003), favipiravir remains a promising countermeasure against emerging and  
57 re-emerging viral diseases caused by RNA viruses. Clinical trials showed the efficacy of  
58 favipiravir against viral hemorrhagic fever caused by the Severe Fever with Thrombocytopenia  
59 Syndrome Virus (SFTSV), and a direct correlation between favipiravir treatment and reduction  
60 in viral RNA levels (Suemori et al., 2021). However, an open-label observational study on  
61 Ebola virus showed lack of efficacy of favipiravir treatment in reducing the viral load reduction

62 and improving survival of the affected subjects (Madelain et al., 2017). Prior to the discovery  
63 of favipiravir, ribavirin was the only available antiviral drug effective against JUNV  
64 (Weissenbacher et al., 1986). However, several concerns over safety and efficacy are linked  
65 with the use of ribavirin, limiting its clinical use (Enria et al., 2008). Several pre-clinical studies  
66 investigated the inhibitory effect of antiviral drugs in JUNV infections (Gowen et al., 2017,  
67 2013). Favipiravir showed high protection against lethal JUNV infection and was well tolerated  
68 at high doses. Notably, while ribavirin shows high efficacy in suppressing viral replication, the  
69 mortality of the infected animal models is only delayed or slightly reduced by ribavirin  
70 (Kenyon et al., 1986; McKee et al., 1988). Moreover, while favipiravir specifically targets the  
71 viral polymerase with minimal side effects (Furuta et al., 2005), ribavirin acts through multiple  
72 mechanisms. In addition to the inhibition of viral polymerase, ribavirin targets cellular inosine  
73 monophosphate dehydrogenases and restricts intracellular GTP availability, thereby indirectly  
74 inhibiting virus replication. This explains the synergistic effect of ribavirin when used with  
75 favipiravir, which offers a combinational therapeutic approach for the clinical management of  
76 patients with AHF (Carrillo-Bustamante et al., 2017; Westover et al., 2016).

77         The emergence of drug-resistant mutants invalidates the effect of antiviral drugs in the  
78 short term. To date, experimental isolation of favipiravir-resistant mutants has only been  
79 reported for chikungunya virus (Delang et al., 2014) and enterovirus 71 (Wang et al., 2016),  
80 which are positive-sense RNA viruses, as well as the influenza A virus, which contains a  
81 negative-sense, segmented RNA genome (Goldhill et al., 2018b). Isolation of drug-resistant  
82 mutants represents a useful approach for studying the molecular mechanisms of antiviral drugs  
83 (Lo et al., 2020). Considering the possibility of the emergence of drug-resistant mutants and  
84 the gap in the mechanistic data on the antiviral action of favipiravir against arenaviruses  
85 (Mendenhall et al., 2011b), we attempted to isolate favipiravir-resistant JUNV. In this study,  
86 we isolated favipiravir-resistant mutants, also labelled escape mutants, with two amino acid

87 substitutions on the viral GPC and RdRp. The analyses of the escape mutant, for the first time,  
88 provided experimental evidence that favipiravir primarily acts against JUNV by inducing  
89 transition mutations. Here, we showed that the selective pressure of favipiravir promoted the  
90 emergence of the JUNV variant with a higher replication fidelity and, therefore, a lower  
91 susceptibility to favipiravir. We also showed that the treatment with combination of favipiravir  
92 with either ribavirin or remdesivir inhibited JUNV replication in a synergistic manner. The  
93 clinical implications of these findings need to be considered prior to the therapeutic use of  
94 favipiravir in the individuals with a recent history of Candid #1 vaccination.

95

## 96 RESULTS

### 97 Isolation of favipiravir-resistant mutants

98 For the isolation of favipiravir-resistant JUNV mutants in this study, 293T cells were  
99 chosen because of the robust replication kinetics of JUNV in this cell line. To identify the  
100 optimal selective pressure of favipiravir on JUNV replication, the IC<sub>50</sub> value was determined  
101 by a dose-response experiment. 293T cells were infected with Candid #1 virus at a multiplicity  
102 of infection (MOI) of 0.1, in the presence of a series of favipiravir dilutions or DMSO.  
103 Quantification of viral titers at 48 hours post infection (hpi), showed favipiravir IC<sub>50</sub> to be 4.9  
104 μM with 95% confidence interval (CI) of 4.5 μM to 5.4 μM. This value is comparable with  
105 that of a previous study reporting favipiravir IC<sub>50</sub> for JUNV in Vero cells (Gowen et al., 2007).  
106 The cytotoxicity assay showed that favipiravir lacked toxic effects on cell viability at the  
107 specified concentrations (**Fig. S1**). We selected 5 μM of favipiravir as an optimal selective  
108 pressure. First, the cells were infected with the JUNV Candid #1 strain (MOI: 0.01). After  
109 adsorption, medium containing either favipiravir or DMSO was added, and cells were then  
110 incubated. Additional infection control using fresh virus stock (no passage control) in the  
111 absence of favipiravir/DMSO was used to monitor the accumulation of defective interfering  
112 particles (data not shown) (Ziegler and Botten, 2020). Viral titers were measured using plaque  
113 assays after every passage. On the first two initial passages, P0 and P1, JUNV titers showed an  
114 81.7- and 105-fold reduction, respectively (**Fig. 1A**). To increase the selective pressure,  
115 favipiravir concentration was increased to 20 μM (approximately IC<sub>90</sub>) for subsequent passages.  
116 The increase of favipiravir concentration was associated with a reduction in titer similar to that  
117 detected using 5-μM favipiravir, indicating that a resistant population was beginning to emerge.  
118 As shown in **Fig. 1A**, at passage 11 (P11), viral titers were similar to those of no-drug controls,  
119 suggesting that a dominant proportion of the viral population was resistant to favipiravir.  
120 Further passaging (P12 and P13) in the presence of favipiravir did not affect viral titers. To

121 measure the reduction in susceptibility of the P11 virus to favipiravir, a dose-response assay  
122 was performed. As shown in **Fig. 1B**, IC<sub>50</sub> values of P0 and P11 were 4.3 μM (95% CI = 3.8  
123 to 4.9) and 27.1 μM (95% CI = 23.1 to 31.6), respectively, indicating a significant increase in  
124 IC<sub>50</sub> value (6.3-fold) and the emergence of favipiravir-resistant Candid #1-mutant (Candid #1-  
125 res).

126

### 127 **Identification of the mutations in the favipiravir-resistant JUNV mutant**

128 To identify the mutations that confer resistance to favipiravir, four clones were isolated  
129 from P11 by plaque assay, as described in the Materials and Methods section. Viral RNA from  
130 each clone was extracted and the sequences of all open reading frames (ORFs) were determined.  
131 All four clones showed the same mutations as the P0 parental virus. Three nucleotide  
132 substitutions, two in the RdRp coding region (1384 A to G, 3669 A to G) and one in the GPC  
133 coding region (502 G to A), were identified in P11 mutants (**Fig. 2**). In the RdRp region, the A  
134 to G substitution at 3669 generated a synonymous mutation, whereas the A to G substitution at  
135 1384 led to N462D amino acid modification in the PA-like domain of RdRp (Brunotte et al.,  
136 2011; Peng et al., 2020). In the GPC region, G to A substitution at 502 caused an A168T amino  
137 acid substitution within the GP1 subunit. No mutations were observed in Z or NP genes.

138

### 139 **Growth kinetics of favipiravir-resistant JUNV mutant**

140 First, we compared the growth kinetics of Candid #1-res (P11) to parental Candid #1  
141 (P0) in the absence of favipiravir. After virus adsorption on ice to synchronize the infection as  
142 described in the Materials and Methods, 293T cells infected with either Candid #1 or Candid  
143 #1-res were incubated and culture supernatants were collected at 8, 12, 24, and 28 hpi. Viral  
144 titers in the culture supernatants were determined by plaque assay. Efficient replication of

145 Candid #1-res was observed at 8 hpi, which was much earlier than that of parental Candid #1  
146 (**Fig. 3**). However, there was no significant difference between the titers of both viruses at 28  
147 hpi, indicating that Candid #1-res exhibited the rapid growth. No differences in plaque  
148 morphologies were observed (data not shown).

149

### 150 **High-fidelity replication of favipiravir-resistant JUNV**

151 To understand the mechanism by which JUNV acquired resistance against favipiravir,  
152 the mutation frequency of Candid #1 and Candid #1-res in the presence of favipiravir was  
153 assessed. First, 293T cells were infected with Candid #1 or Candid #1-res at MOI=0.1 and  
154 incubated in the presence of 20  $\mu$ M favipiravir. After 48 h, the culture supernatants were  
155 collected. The nucleoprotein (NP) gene of arenaviruses is highly prone to mutations (Grande-  
156 Pérez et al., 2015), therefore, we selected and cloned the same region of the NP gene from each  
157 virus and performed clonal sequencing. As shown in **Fig. 4**, the mutational analysis of a total  
158 of 24,300 nucleotides for the parental Candid #1 and 27,450 nucleotides for the Candid #1-res  
159 showed that the resistant mutant had acquired 1.82 mutations per 10,000 nucleotides as  
160 compared to the 8.64 mutations of the parental population (4.7-fold lower.  $P = 0.0053$ , Mann–  
161 Whitney  $U$  test), indicating higher fidelity of the Candid #1-res virus. Similarly, mutation  
162 frequencies of Candid #1-res in DMSO-treated controls were slightly lower (3.8-fold),  
163 although the data lacked statistical significance ( $P = 0.242$ , Mann–Whitney  $U$  test). The  
164 frequency of favipiravir-induced mutations in the parental Candid #1 is estimated to be beyond  
165 the tolerable threshold of error-catastrophe, and is comparable to those reported for other  
166 viruses, including influenza, Zika, and murine norovirus treated with favipiravir (Arias et al.,  
167 2014; Bassi et al., 2018; Goldhill et al., 2019). These data suggest that mutagenesis with lethal  
168 consequences is the primary mechanism of favipiravir antiviral action against JUNV.



169           Next we categorized the substitutions to determine the proportions of transitions versus  
170 transversions. The most common mutations in the presence of favipiravir were G to A,  
171 followed by T and C mutations, accounting for 80% of all substitutions in favipiravir-treated  
172 viruses, indicating that the mutation profile induced by favipiravir is biased towards transitions  
173 (**Fig. 4**). This is in agreement with studies on other viruses treated with favipiravir (Arias et al.,  
174 2014; Ávila et al., 2016; Goldhill et al., 2019; Guedj et al., 2018). Consistent with the literature,  
175 supplementation of purines, but not pyrimidines, reversed the antiviral activity of favipiravir  
176 (**Fig. S2**) (Mendenhall et al., 2011a), reaffirming the role of favipiravir as a purine analogue  
177 that competes with adenosine and guanosine during nucleotide incorporation. This, in turn,  
178 explains the error bias observed in the transitional mutations.

179

#### 180 **Reduced specific infectivity of favipiravir-resistant JUNV**

181           To further evaluate the mutagenic effect of favipiravir on Candid #1 and Candid #1-res  
182 viruses, their respective specific infectivity (defined as the ratio of infectious virions to the  
183 encapsidated genome copy number), when exposed to increasing concentrations of favipiravir,  
184 were compared. 293T cells were infected with Candid #1 or Candid #1-res (MOI=0.01), and  
185 then treated with serial dilutions of favipiravir or DMSO. Specific infectivity of Candid #1 at  
186 48 hpi was 0.85 and 0.39 log<sub>10</sub> plaque-forming units (PFU) per mL/log<sub>10</sub> RNA copies per mL  
187 for 2 μM and 64 μM favipiravir, respectively, and showed a concentration-dependent reduction  
188 (**Fig. 5**). This suggests that increasing concentrations of favipiravir cause the accumulation of  
189 lethal mutations that lead to the loss of JUNV infectivity (Arias et al., 2014; Espy et al., 2019).  
190 In contrast, specific infectivity of Candid #1-res virus was only slightly affected from 1.009 to  
191 0.80 log<sub>10</sub> PFU per mL/log<sub>10</sub> RNA copies per mL, when exposed to 2-μM and 64-μM  
192 favipiravir respectively. The significant reduction in specific infectivity of Candid #1 compared

193 to that of the Candid #1-res virus ( $P < 0.0001$ , two-way ANOVA test) suggests that the resistant  
194 mutant is less susceptible to the mutagenic effect of favipiravir. Notably, we did not observe  
195 any difference in viral RNA copy numbers between Candid #1 and Candid #1-res variants  
196 across any concentration (up to 64  $\mu$ M) of favipiravir treatment (data not shown). Taken  
197 together, these data indicate that the lower susceptibility of Candid #1-res virus to favipiravir  
198 is mediated by its higher replication fidelity.

199

### 200 **Enhancement of JUNV growth by GPC-A168T substitution**

201 To investigate the functional impact of GPC A168T substitution on virus entry, we  
202 compared the internalization dynamics of favipiravir-susceptible (P0) and resistant variants  
203 (P11) using a pseudotyped vesicular stomatitis virus (VSV) system in 293T cells. To normalize  
204 the number of viral particles used for infection, real time qPCR targeting the VSV-M gene was  
205 performed (**Fig. S3**). A confluent monolayer of cells was infected with the pseudotyped VSV  
206 bearing GPC-A168 or GPC-T168, Candid#1pv-A168 or Candid#1pv-T168, which have  
207 equivalent copies of the VSV genome. To allow synchronized virus entry, cells were first  
208 incubated at 4 °C for 30 min and subsequently transferred to 37 °C for further incubation.  
209 Measurements of luciferase signal at 8, 16, and 24 hpi showed a significant difference at 16  
210 hpi, with Candid#1pv-T168 having more robust entry kinetics compared to Candid#1pv-A168  
211 (**Fig. 6A**). We then examined the intracellular levels of the VSV-M protein as a marker of  
212 fusion efficiency. Using a similar experimental setup, 293T cells were infected with an equal  
213 number of viral particles (input virus). After 8 h, the cells were lysed, and samples were  
214 prepared for the detection of VSV-M protein using western blotting (**Fig. 6B**). Candid#1pv-  
215 T168 showed 12 times more intracellular M protein expression levels than Candid#1pv-A168,  
216 despite similar levels of input virus (**Fig. 6C**), indicating that the viral genome was released

217 into the cytoplasm more efficiently, leading to more rapid and elevated VSV-M protein  
218 expression. These data suggest that Candid#1pv-T168 is more efficient in the entry and/or  
219 fusion processes, leading to an altered viral life cycle.

220

### 221 **Effect of RdRp-N462D substitution on RNA polymerase activity**

222 Next, we investigated whether N462D substitution affects RdRp activity in Candid #1.  
223 A minigenome (MG) system based on the S segment of Candid #1 virus was constructed, and  
224 an MG assay in absence of favipiravir was performed. To ensure that both RdRp-N462 and -  
225 D462 plasmids had comparable expression levels, both proteins were tagged with a FLAG  
226 peptide and similar expression levels were confirmed by western blot analysis (**Fig. 7A and B**).  
227 293T cells were transfected in 24-well plates with the plasmids for either NP, MG, RdRp-N462,  
228 RdRp-D462, or empty vector. Luciferase signals (normalized to the internal control) were  
229 measured at 24 hours post-transfection (hpt). The results are expressed as relative induction  
230 rates. We observed that N462D substitution had no significant effect on RNA polymerase  
231 activity (**Fig. 7C**). To examine the sensitivity of RdRp-D462 to favipiravir, the activity of both  
232 polymerases exposed to different concentrations of the drug using a minigenome system was  
233 tested. No significant difference in favipiravir dose-response in RdRp-N462 ( $IC_{50} = 245.6\text{--}$   
234  $304.3 \mu\text{M}$  [95% CI]) and RdRp-D462 ( $IC_{50} = 289.8\text{--}362.1 \mu\text{M}$  [95% CI]) was observed,  
235 although RdRp-D462 showed a slightly increased resistance to favipiravir compared with that  
236 of RdRp-N462 (**Fig. 7D**). No cytotoxicity was observed in this assay (**Fig. 7E**). Quantification  
237 of the luciferase mRNA showed that high concentrations of favipiravir ( $\geq 200 \mu\text{M}$ ) act as a  
238 chain terminator, and reflected the reduction of luciferase signal in the MG assay (**Fig. 7F**).

239

### 240 **Combinational inhibitory effect of favipiravir with either ribavirin or remdesivir on** 241 **JUNV growth**

242 Combination antiviral therapy is a promising approach to minimize the risk of the emergence  
243 of drug resistance and enhance the antiviral effect. Therefore, we investigated the inhibitory  
244 effect of favipiravir in combination with ribavirin and remdesivir. As shown in **Fig. 8**, the anti-  
245 JUNV effect of favipiravir was significantly higher when combined with ribavirin (ZIP synergy  
246 score: 14.02) or remdesivir (ZIP synergy score: 15.82) without any significant antagonistic  
247 effect. No cytotoxicity was associated with any of the tested drug combinations. Despite our  
248 attempt to isolate a resistant variant to combinational treatments, no resistant variant was  
249 generated even after 15 passages (**Fig. S4**).

## 250 DISCUSSION

251 In this study, we attempted to understand the mechanism of antiviral action of  
252 favipiravir against JUNV by isolating resistant variants. In our approach, lower concentrations  
253 of favipiravir for three initial passages followed by higher concentrations for the remaining  
254 passages were used. This allowed a gradual accumulation of mutant variants under a moderate  
255 drug pressure and to avoid sudden exposure of JUNV to lethal concentrations of favipiravir  
256 (Pauly and Luring, 2015), thus enabling us to successfully maintain and isolate the resistant  
257 population.

258 The arenavirus RdRp consists of three domains: an N-terminal PA-like domain with  
259 endonuclease activity, a polymerase region possessing the active site, and a PB2-like domain.  
260 In contrast to previous studies showing that RNA viruses developed resistance to favipiravir  
261 through mutations in the conserved catalytic domain of viral RdRp (Delang et al., 2014;  
262 Goldhill et al., 2018b; Wang et al., 2016), we identified an RdRp-N462D substitution within  
263 the PA-like domain in favipiravir-resistant variants. A recent study, which resolved the  
264 structure of arenavirus polymerase protein with a near-atomic resolution, showed that residue  
265 462 of new world arenaviruses belongs to the core lobe region of the PA-like domain, which  
266 is involved in stabilization of the polymerase active site. However, the precise interactions of  
267 the =462 residue are yet to be clarified (Peng et al., 2020). Our assessment of the functional  
268 impact of N462D substitution using an MG system showed only a slight, statistically non-  
269 significant ( $P = 0.125$ ) reduction in reporter activity without any major impact on polymerase  
270 function (**Fig. 7C**). However, comparisons of mutation frequencies of Candid #1 and Candid  
271 #1-res virus revealed a significant reduction in polymerase error number in the case of RdRp-  
272 D642, suggesting an important role of this residue in polymerase fidelity (**Fig. 4**). The leading  
273 hypothesis on the mechanism of the favipiravir resistance observed in this study is that the  
274 N462D substitution enhances the selectivity of RdRp for the correct nucleoside triphosphates

275 during replication and transcription, resulting in lower favipiravir incorporation, as described  
276 for other mutagen-resistant RNA viruses (Cheung et al., 2014; Pfeiffer and Kirkegaard, 2003).  
277 Further analysis of binding affinities will clarify the precise mechanism of D462 resistance to  
278 favipiravir. Notably, the higher fidelity of Candid #1 mutant virus correlated with resistance to  
279 favipiravir, and the virus remained susceptible to higher concentrations of the drug, indicating  
280 that RdRp-D462 does not tolerate the chain termination activity of favipiravir, as was  
281 demonstrated in this study through the MG system (**Fig. 7D and F**). Accordingly, the Candid  
282 #1-res virus remained susceptible to other purine analogues, ribavirin and remdesivir, with non-  
283 mutagenic mechanisms of action (**Fig. S5**) (Feld and Hoofnagle, 2005; Furuta et al., 2005;  
284 Mendenhall et al., 2011a; Tchesnokov et al., 2020). To date, with the exception of the influenza  
285 virus (Cheung et al., 2014), other RNA viruses with high replication fidelity possess a positive-  
286 sense, non-segmented genome (Pfeiffer and Kirkegaard, 2003; Sadeghipour et al., 2013). To  
287 the best of our knowledge, this is the first report on the isolation of a high-replication fidelity  
288 phenotype amongst hemorrhagic fever viruses. Studies have demonstrated that higher fidelity  
289 of replication affects the genetic heterogeneity of viral sub-populations, imposing a fitness cost  
290 *in vivo* (Cheung et al., 2014; Pfeiffer and Kirkegaard, 2005; Vignuzzi et al., 2006). Hence, there  
291 remains a need to further investigate the virulence and pathological characteristics of JUNV  
292 with high-fidelity replication, which was isolated in this study.

293 The other mutation (A168T) identified in this study was found to be within the GP1  
294 subunit of the glycoprotein complex (GPC). Arenavirus GPC is a precursor protein that forms  
295 a trimer of stable signal peptides, GP1 and GP2 subunits, upon maturation by cellular enzymes.  
296 During virus entry, GP1 and GP2 are responsible for the recognition of receptors and the fusion  
297 with endosome membranes, respectively (Urata and Yasuda, 2012). While A168T substitution  
298 led to more efficient viral entry (**Fig. 6**), no impact on attachment of pseudotype viral particles  
299 to the target cells was observed (data not shown), suggesting that the functional importance of

300 the A168T substitution is on the post-attachment step of JUNV virus entry. Consistent with  
301 this, growth kinetics of the Candid #1-res virus represented more robust replication at earlier  
302 time points (**Fig. 3**). In recent years, a novel mechanism of drug resistance mediated by an  
303 altered viral life cycle has been postulated (Neagu et al., 2018; Sedaghat and Wilke, 2011).  
304 While there is no experimental evidence to fully support this theory, co-emergence of surface  
305 glycoprotein mutations together with RdRp mutation also has been reported to occur in a  
306 remdesivir-resistant variant of SARS-CoV-2 (Szemiel et al., 2021), highlighting the possible  
307 role of infection synchronicity (life cycle adaptability) on the potency of antiviral drugs.  
308 Nevertheless, in the absence of a reverse genetics system, we were unable to confirm whether  
309 the altered life cycle of JUNV imposed by the GP1-A168T substitution plays a direct role in  
310 reducing susceptibility to favipiravir.

311 Here, we experimentally demonstrated that the potency of favipiravir could be  
312 significantly enhanced against JUNV if used in combination with ribavirin or remdesivir (**Fig.**  
313 **8**). Furthermore, we showed that it was difficult to isolate JUNV variants that were resistant to  
314 the combination treatment (**Fig. S4**). These findings suggest the potential of combination  
315 therapies for favipiravir with ribavirin or remdesivir.

316 In conclusion, we described the isolation of a high replication fidelity variant of  
317 arenavirus with reduced susceptibility to favipiravir. More importantly, we provide  
318 experimental evidence that hyper-mutagenesis is the primary mechanism of favipiravir action  
319 against JUNV. Consistent with our observations, studies on favipiravir treatment of non-human  
320 primates infected with Lassa virus showed a reduction in virus infectivity without affecting  
321 viral load, providing evidence that favipiravir is primarily a mutagen against old world  
322 arenaviruses (Lingas et al., 2021; Rosenke et al., 2018). Our findings emphasize the importance  
323 of the addition of a non-mutagenic inhibitor to the treatment regimens for the Argentine  
324 hemorrhagic fever (AHF).

325

## 326 **MATERIALS AND METHODS**

327 **Cells, viruses, and compounds.** Human embryonic kidney (293T) and African green monkey  
328 kidney (Vero 76) cell lines were maintained in Dulbecco's modified Eagle's medium (DMEM;  
329 Invitrogen, CA, USA) with 10% fetal bovine serum (FBS) and 1% penicillin and streptomycin.  
330 The Candid #1 vaccine strain of JUNV was kindly provided by Dr. Juan C. de la Torre (Scripps  
331 Research Institute, California, USA). Favipiravir was obtained from FUJIFILM Toyama  
332 Chemical CO., LTD. (Toyama, Japan). Ribavirin (Sigma Aldrich, MO, USA) and remdesivir  
333 (Cayman, MI, USA) were purchased. All compounds were dissolved in 100% dimethyl  
334 sulfoxide (DMSO) and stored at  $-30^{\circ}\text{C}$  until use.

335

336 **Virus infection and titration.** Cells were infected with Candid #1 strain at the indicated  
337 multiplicity of infection (MOI). After adsorption for 1 h at  $37^{\circ}\text{C}$ , the inoculum was removed  
338 and washed with PBS (-). Pre-warmed DMEM containing 10% FBS was added to the cells,  
339 which were then incubated at  $37^{\circ}\text{C}$  with 5%  $\text{CO}_2$ . For the quantification of viral titers, a plaque  
340 assay was performed according to standard procedures using 10-fold dilutions of the samples  
341 in Vero 76 cells as previously described (Zadeh et al., 2020).

342

343 **Determination of inhibitory concentrations and toxicity testing.** To determine the half-  
344 maximal inhibitory concentration ( $\text{IC}_{50}$ ), 293T cells were infected at a MOI of 0.1 in 24-well  
345 plates as explained above. After adsorption, the virus solutions were removed, and fresh  
346 DMEM containing serial dilutions of compounds (ranging from  $2\ \mu\text{M}$  to  $64\ \mu\text{M}$  for  
347 favipiravir/ribavirin and  $0.0125\ \mu\text{M}$  to  $4\ \mu\text{M}$  for remdesivir) were added to the infected cells.  
348 At 48 hpi, the supernatants were collected to determine viral titers by plaque assay. To plot the



349 dose-response curve, viral titers from each drug concentration were normalized to the titers in  
350 the DMSO control. The cytotoxicity of the compounds was assessed using the CellTiter-Glo  
351 cell viability assay (Promega, Madison, WI, USA), following the manufacturer's instructions.  
352 Briefly, 293T cells were seeded in a 96-well plate and incubated overnight. Cells were then  
353 treated with different concentrations of each compound, as described above. After 48 h,  
354 CellTiter-Glo reagent was added, and luminescence was measured using an illuminometer  
355 (Tristar LB941, BERTHOLD). Cell viability in DMSO-treated controls was set to 100%.

356

357 **Selection and purification of JUNV favipiravir-resistant mutants.** To isolate favipiravir-  
358 resistant JUNV, we serially passaged the Candid #1 strain in 293T cells at a MOI of 0.01 under  
359 the selective pressure of favipiravir (5  $\mu$ M for the first three passages and 20  $\mu$ M for the  
360 remaining passages). As a control, viruses were serially passaged in the absence of favipiravir  
361 in parallel. Supernatants were diluted 10 times in Opti-MEM (Invitrogen) before infecting the  
362 cells for the next passages. At 48 hpi, two aliquots of the supernatants were prepared and stored  
363 at  $-80^{\circ}\text{C}$ . Virus titers were measured using plaque assays. To isolate a single clone of the virus,  
364 a plaque assay was performed in 6-well plates in Vero 76 cells as described above. After 7 days  
365 of incubation, plaques were collected and inoculated into 293T cells to expand the virus clone.  
366 To isolate resistant mutants against combination of favipiravir (0.3  $\mu$ M) and ribavirin (0.3  $\mu$ M)  
367 or remdesivir (1 nM), the virus was passaged and titrated under similar conditions as stated  
368 above.

369

370 **Reverse transcription polymerase chain reaction (RT-PCR) and RNA sequencing.** RNA  
371 was extracted from the supernatant of cells infected with Candid #1 (P0 and P11) using the  
372 QIAamp Viral RNA Mini Kit (Qiagen, Hilden, Germany), according to the manufacturer's

373 instructions. For the sequencing, 15 sets of primers were designed to produce overlapping PCR  
374 products of 800 to 900 bp (Table S1) using the Primal Scheme (available at  
375 <http://primal.zibraproject.org/>) (Abe et al., 2020). The reference sequences used to design the  
376 primers were obtained from the Candid #1 vaccine strain (accession number: AY746354.1 for  
377 the L segment and AY746353.1 for the S segment). Viral RNA was amplified using  
378 PrimeScript II High Fidelity One Step RT-PCR Kit (Takara Bio, Shiga, Japan) under the  
379 following reaction conditions: 45 °C for 10 min, 94 °C for 2 min, 98 °C for 10 s, 55 °C for 15  
380 s, and 68 °C for 10 s, for a total of 30 cycles. The products were then gel-purified using the  
381 QIAquick Gel Extraction Kit (Qiagen), according to the manufacturer's instructions. Purified  
382 PCR products were sequenced using the BigDye Terminator v3.1 cycle sequencing kit (Thermo  
383 Fisher Scientific, MA, USA) and a ABI3500 sequencer (Thermo Fisher Scientific). Consensus  
384 sequences were generated and analyzed using GENETYX (GENETYX Corp., Tokyo, Japan)  
385 and SnapGene® softwares (GSL Biotech; available at [snapgene.com](http://snapgene.com)). The sequences were  
386 submitted to the DNA Data Bank of Japan (DDBJ) (accession numbers: LC637306 for  
387 Candid1-P0-RdRp, LC637307 for Candid1-P0-Z, LC637308 for Candid1-P0-GPC,  
388 LC637309 for Candid1-P0-NP, LC637310 for Candid1-P11-RdRp, LC637311 for Candid1-  
389 P11-Z, LC637312 for Candid1-P11-GPC, and LC637313 for Candid1-P11-NP genes).

390

391 **Virus growth analysis.** To compare growth kinetics of Candid #1 and Candid #1-res viruses,  
392 293T cells were infected with each virus at an MOI of 0.1 in 24-well plates in duplicates.  
393 Infected cells were incubated on ice for 30 min with shaking the plate every 10 min. After  
394 inoculum removal, cells were washed twice with DMEM, and fresh media was added. Cells  
395 were incubated at 37 °C and viral titers were measured at 8, 12, 24, and 28 h post infection.

396

397 **Determination of the mutation frequency.** Candid #1 and Candid #1-res viruses were used  
398 to infect 293T cells (MOI: 0.01) in the presence of 20  $\mu$ M favipiravir or DMSO. At 48 hpi,  
399 RNA was extracted from culture supernatants and used to amplify a part of the NP gene using  
400 primer number five described in **Table S1**, with the high-fidelity One Step RT-PCR Kit (Takara  
401 Bio). PCR products were gel purified and cloned into the pCR4-TOPO vector using the Zero  
402 Blunt Topo Cloning Kit (Invitrogen). The clones were sequenced as described above. A  
403 fragment of 450 bp was used for nucleotide polymorphism analysis.

404

405 **Nucleoside supplementation assay.** 293T cells were infected with JUNV (MOI: 0.01). After  
406 adsorption at 37 °C for 1 h and removal of the inoculum, serial dilutions of the nucleosides  
407 adenosine (Sigma), guanosine (Sigma), thymine (Sigma), cytosine (Sigma), and uracil (Sigma)  
408 were added to the cells in combination with 50  $\mu$ M (approximately 10 times the IC<sub>50</sub>) of  
409 favipiravir in triplicate. Cells treated with DMSO or favipiravir alone were used as controls. At  
410 48 hpi, a plaque assay was performed to measure viral titers. Cells were visually inspected for  
411 any signs of cytotoxicity upon nucleoside treatment, and no toxic effects were observed.  
412 Results were expressed as a percentage reduction of the favipiravir anti-JUNV activity.

413

414 **Pseudotyped VSV production and virus entry assay.** Full-length coding regions of JUNV  
415 GPC-A168 (from P0) and GPC-T168 (from P11) were cloned into the pCAGGS mammalian  
416 expression vector. Plasmids were designated as pC-GPC-A168 and pC-GPC-T168.  
417 Pseudotyped vesicular stomatitis virus (VSV) with a luciferase reporter gene, bearing JUNV  
418 GPC, was generated and titrated, as previously described (Kurosaki et al., 2018; Ushijima et  
419 al., 2021). Briefly, 293T cells were seeded in 6-well plates. After 8 h, cells were transfected  
420 with 3  $\mu$ g of either each GPC expression plasmid or pCAGGS empty vector using TransIT LT-

421 1 reagent (Mirus, Madison, WI, USA), according to the manufacturer's instructions. At 24 hpt,  
422 cells were infected with G-complemented VSVΔG/Luc and incubated for 1 h at 37 °C for  
423 adsorption. The cells were washed three times with PBS, and DMEM containing 10% FBS was  
424 added to them. Pseudotyped viruses were collected at 24 hpi and labelled as Candid#1pv-A168  
425 and Candid#1pv-T168, respectively. Viruses were stored at -80 °C until use. For the  
426 internalization assay, a confluent monolayer of 293T cells in a bottom-clear 96-well plate was  
427 cooled at 4 °C for 10 min and subsequently infected with either Candid#1pv-A168 or  
428 Candid#1pv-T168. The plates were further incubated at 4 °C for 30 min to allow the binding  
429 of viral particles to the receptor without initiation of the entry step (Carette et al., 2011). The  
430 cells were then washed three times with PBS to remove unbound viral particles. The plates  
431 were subsequently incubated at 37 °C. Luciferase activity was measured using the Steady-Glo  
432 Luciferase Assay System (Promega) and a TriStar LB 941 microplate reader (Berthord Japan  
433 K.K., Tokyo, Japan). Since there was a plateau effect at 24 hpi (data not shown), we considered  
434 the signal activity at this time point to be 100%.

435

436 **Western blotting.** Supernatants containing pseudotyped virus were briefly cleared from debris  
437 by centrifugation. Ultracentrifugation was performed over a 20% sucrose cushion to pellet  
438 virion (60,000 rpm for 30 min at 4 °C). For the detection of intracellular proteins, cells were  
439 lysed using lysis buffer (1% NP-40, 50 mM Tris-HCl [pH 8.0], 62.5 mM EDTA, and 0.4%  
440 sodium deoxycholate). Prepared samples were analyzed by separation on either 12% (for VSV  
441 samples and actin) or 7.5% (for RdRp) sodium dodecyl sulphate–polyacrylamide gels through  
442 electrophoresis (SDS-PAGE) and western blotting (WB), as previously described (Zadeh et al.,  
443 2020). FLAG-tagged proteins, VSV M protein, or β-Actin were detected using mouse  
444 monoclonal primary antibodies against FLAG (M2, F1804, Sigma), VSV M (Kerafast, MA,  
445 USA), or β-actin (Sigma), respectively, and HRP-conjugated anti-mouse IgG secondary

446 antibody (Sigma). The labelled proteins were then visualized using ECL prime (GE Healthcare)  
447 and LAS3000 (GE Healthcare), according to the manufacturer's instructions. The results were  
448 quantified using Multi Gauge software (Fujifilm, Tokyo, Japan).

449

450 **Quantitative real time-polymerase chain reaction (qPCR).** Relative quantification of  
451 pseudotyped VSV was performed with a qPCR assay using forward (5'-  
452 TGTACATCGGAATGGCAGGG-3') and reverse (5'-TGCCTTCACAGTGAGCATGATAC-  
453 3') primers specific to the VSV M gene. One-Step TB Green PrimeScript PLUS RT-PCR Kit  
454 (Takara Bio) was used under the following conditions: 42 °C for 5 min, 95 °C for 5 s, and 60 °C  
455 for 34 s, for a total of 40 cycles using an ABI 7500 thermocycler (Applied Biosystems, Foster  
456 City, CA, USA). To quantify the encapsidated viral RNA copy numbers, the free RNA not  
457 associated with virions was removed from the samples using the Benzonase nuclease (Sigma),  
458 according to the manufacturer's instructions, prior to viral RNA extraction. Standard RNA was  
459 synthesized from a partial region of the GPC gene using the forward (5'-  
460 TAATACGACTCACTATAGGGCCAACCTTTTTGCAGGAGGC-3') and reverse (5'-  
461 AGCTTCTTCTGTGCAGGATCTTCCTGCAAGCGCTAGGAAT-3') primers and the T7  
462 RNA polymerase (Promega), as previously described (Pemba et al., 2019). The prepared RNA  
463 was then serially diluted using DEPC-treated water to obtain a standard curve ranging from  
464  $10^2$ – $10^{13}$  copies/mL. To quantify the nano-luciferase mRNA extracted from the minigenome  
465 assay, relative qPCR was performed using *GAPDH* expression as a control, as previously  
466 described (Zadeh et al., 2020), and specific primers targeting the nano-luciferase transcript  
467 (Forward, 5'-GGGAGGTGTGTCCAGTTTGT-3' and reverse, 5'-  
468 CCGCTCAGACCTTCATACGG-3').

469

470 **Minigenome assay.** To compare the polymerase activities of RdRp-N462 and RdRp-D462, an  
471 MG system was constructed based on the Candid #1 S segment. First the coding region of  
472 Candid #1 RdRp was amplified using RNA extracted from P0 or P11 viruses and the  
473 PrimeScript II High Fidelity One Step RT-PCR Kit (Takara Bio). Kozak sequence, a FLAG  
474 tag (N-terminal), and a linker sequence (5'-GGTAGCGGCAGCGGTAGC-3') were added  
475 through three additional PCR reactions using PrimeStar GXL DNA polymerase (Takara Bio).  
476 PCR products were gel-purified in each step, as described elsewhere. The entire fragment was  
477 then infused into a pCAGGS expression vector using an Infusion HD cloning kit (Takara Bio),  
478 according to the manufacturer's instructions. The plasmid expressing JUNV NP, pC-Candid-  
479 NP, was kindly provided by Dr Juan C. de la Torre (Scripps Research Institute) (Emonet et al.,  
480 2011). To construct the MG plasmid, sequences of the untranslated regions (UTRs) of the  
481 Candid #1-S segment (based on the accession number AY746353) containing the 3' UTR, 5'  
482 UTR, and intergenic region in an antisense orientation were synthesized (GENEWIZ, NJ,  
483 USA). An additional G residue was added upstream of the 3' UTR to enhance the efficiency of  
484 the system (Emonet et al., 2011). The synthesized fragment was then cloned into a pHH21  
485 plasmid under the control of the human polymerase-I promoter (Neumann et al., 1999). The  
486 nano-luciferase (nluc) reporter gene was then inserted into the NP locus. Further details of the  
487 constructs can be provided upon request. To perform the assay, plasmids of Candid #1 NP, MG  
488 (with nluc reporter), and RdRp-N462 or RdRp-D462 were transfected into 293T cells at a 1:1:1  
489 ratio using TransIT LT-1 (Mirus, Madison, WI). To normalize transfection efficiency, the  
490 pGL4.75 Renilla luciferase (Rluc) plasmid (Promega) was co-transfected. After 24 or 48 h, the  
491 cells were lysed and divided into two clear-bottom 96-well plates. Equal volumes of nano-Glo  
492 or Renilla-Glo (Promega) were added to measure nluc and Rluc independently. Polymerase  
493 activity was determined by the ratio of nluc/Rluc and expressed as relative luciferase induction.  
494

## 495 **Drug combination assay and synergy analysis**

496 To evaluate the combinational efficacy of favipiravir with either ribavirin or remdesivir, 293T  
497 cells infected with JUNV (MOI: 0.1) were treated with two-fold serially diluted combinations  
498 of the drugs at the indicated concentrations. Viral titers were determined at 48 hpi by plaque  
499 assay and represented as the percentage inhibition compared to DMSO control for each drug  
500 combination. Synergistic inhibition against JUNV growth was determined using  
501 SynergyFinder (<https://synergyfinder.fimm.fi/>) with the Zero Interaction Potency (ZIP) model  
502 as previously described (Imamura et al., 2021). A synergy score ( $\delta$ -score) of less than  $-10$  is  
503 considered as antagonistic, the score range of  $-10$  to  $10$  suggests an additive drug interaction,  
504 and a score greater than  $10$  indicates a synergistic effect (Ianevski et al., 2020).

505

506 **Statistical analysis.** Non-linear regression analysis was performed to analyze the dose-  
507 response of antivirals. The Mann–Whitney  $U$  rank test was used to compare the mutational  
508 frequency of viruses. Other statistical tests are mentioned in the respective figure legends. All  
509 analyses were performed using Prism version 8 (GraphPad Software Inc., La Jolla, CA, USA).  
510 Graphical representations were created using the web-based software, BioRender  
511 (<https://biorender.com/>).

512

513 **CONFLICT OF INTEREST**

514 Authors declare no conflict of interest.

515

516 **AUTHOR APPROVALS**

517 All authors have seen and approved the manuscript, and that it hasn't been accepted or  
518 published elsewhere.

519

520 **FUNDING**

521 This work was supported by grants from the Japan Agency for Medical Research and  
522 Development (AMED) (Grant No. JP20fk0108072, JP21fk0108080, JP21fk0108114 and  
523 JP21fm0208101).

524

525 **ACKNOWLEDGMENTS**

526 We are grateful to Dr. Haruka Abe for his helpful discussions and valuable comments  
527 on this manuscript. We are also grateful to Drs. Yasuteru Sakurai and Rokusuke Yoshikawa  
528 for their support and useful comments during this research work. We thank Dr. Juan C. de la  
529 Torre (Scripps Research Institute, California, USA) for providing the JUNV Candid #1 strain.  
530 We also thank Editage ([www.editage.com](http://www.editage.com)) for English language editing. Favipiravir was  
531 kindly provided by FUJIFILM Toyama Chemical CO., LTD.

532



533 **REFERENCES**

- 534 Abe, H., Ushijima, Y., Bikangui, R., Ondo, G.N., Zadeh, V.R., Pemba, C.M., Mpingabo, P.I., Igasaki, Y.,  
535 Vries, S.G. de, Grobusch, M.P., Loembe, M.M., Agnandji, S.T., Lell, B., Yasuda, J., 2020. First  
536 evidence for continuous circulation of hepatitis A virus subgenotype IIA in Central Africa. *J.*  
537 *Viral Hepat.* 27, 1234–1242. <https://doi.org/10.1111/jvh.13348>
- 538 Arias, A., Thorne, L., Goodfellow, I., 2014. Favipiravir elicits antiviral mutagenesis during virus  
539 replication in vivo. *eLife* 3. <https://doi.org/10.7554/eLife.03679>
- 540 Ávila, A.I. de, Gallego, I., Soria, M.E., Gregori, J., Quer, J., Esteban, J.I., Rice, C.M., Domingo, E.,  
541 Perales, C., 2016. Lethal Mutagenesis of Hepatitis C Virus Induced by Favipiravir. *PLOS ONE*  
542 11, e0164691. <https://doi.org/10.1371/journal.pone.0164691>
- 543 Bassi, M.R., Sempere, R.N., Meyn, P., Polacek, C., Arias, A., 2018. Extinction of Zika Virus and Usutu  
544 Virus by Lethal Mutagenesis Reveals Different Patterns of Sensitivity to Three Mutagenic  
545 Drugs. *Antimicrob. Agents Chemother.* 62. <https://doi.org/10.1128/AAC.00380-18>
- 546 Borio, L., Inglesby, T., Peters, C.J., Schmaljohn, A.L., Hughes, J.M., Jahrling, P.B., Ksiazek, T., Johnson,  
547 K.M., Meyerhoff, A., O'Toole, T., Ascher, M.S., Bartlett, J., Breman, J.G., Eitzen, E.M.,  
548 Hamburg, M., Hauer, J., Henderson, D.A., Johnson, R.T., Kwik, G., Layton, M., Lillibridge, S.,  
549 Nabel, G.J., Osterholm, M.T., Perl, T.M., Russell, P., Tonat, K., Working Group on Civilian  
550 Biodefense, 2002. Hemorrhagic fever viruses as biological weapons: medical and public  
551 health management. *JAMA* 287, 2391–2405. <https://doi.org/10.1001/jama.287.18.2391>
- 552 Bruenn, J.A., 2003. A structural and primary sequence comparison of the viral RNA-dependent RNA  
553 polymerases. *Nucleic Acids Res.* 31, 1821–1829.
- 554 Brunotte, L., Lelke, M., Hass, M., Kleinstaub, K., Becker-Ziaja, B., Günther, S., 2011. Domain  
555 Structure of Lassa Virus L Protein. *J. Virol.* 85, 324–333. [https://doi.org/10.1128/JVI.00721-](https://doi.org/10.1128/JVI.00721-10)  
556 10
- 557 Carette, J.E., Raaben, M., Wong, A.C., Herbert, A.S., Obernosterer, G., Mulherkar, N., Kuehne, A.I.,  
558 Kranzusch, P.J., Griffin, A.M., Ruthel, G., Cin, P.D., Dye, J.M., Whelan, S.P., Chandran, K.,  
559 Brummelkamp, T.R., 2011. Ebola virus entry requires the cholesterol transporter Niemann–  
560 Pick C1. *Nature* 477, 340–343. <https://doi.org/10.1038/nature10348>
- 561 Carrillo-Bustamante, P., Nguyen, T.H.T., Oestereich, L., Günther, S., Guedj, J., Graw, F., 2017.  
562 Determining Ribavirin's mechanism of action against Lassa virus infection. *Sci. Rep.* 7, 11693.  
563 <https://doi.org/10.1038/s41598-017-10198-0>
- 564 Cheung, P.P.H., Watson, S.J., Choy, K.-T., Sia, S.F., Wong, D.D.Y., Poon, L.L.M., Kellam, P., Guan, Y.,  
565 Peiris, J.S.M., Yen, H.-L., 2014. Generation and characterization of influenza A viruses with  
566 altered polymerase fidelity. *Nat. Commun.* 5, 1–13. <https://doi.org/10.1038/ncomms5794>
- 567 Delang, L., Abdelnabi, R., Neyts, J., 2018. Favipiravir as a potential countermeasure against neglected  
568 and emerging RNA viruses. *Antiviral Res.* 153, 85–94.  
569 <https://doi.org/10.1016/j.antiviral.2018.03.003>
- 570 Delang, L., Segura Guerrero, N., Tas, A., Quérat, G., Pastorino, B., Froeyen, M., Dallmeier, K.,  
571 Jochmans, D., Herdewijn, P., Bello, F., Snijder, E.J., de Lamballerie, X., Martina, B., Neyts, J.,  
572 van Hemert, M.J., Leyssen, P., 2014. Mutations in the chikungunya virus non-structural  
573 proteins cause resistance to favipiravir (T-705), a broad-spectrum antiviral. *J. Antimicrob.*  
574 *Chemother.* 69, 2770–2784. <https://doi.org/10.1093/jac/dku209>
- 575 Emonet, S.E., Urata, S., de la Torre, J.C., 2011. Arenavirus reverse genetics: New approaches for the  
576 investigation of arenavirus biology and development of antiviral strategies. *Virology, Special*  
577 *Reviews Issue* 2011 411, 416–425. <https://doi.org/10.1016/j.virol.2011.01.013>
- 578 Emonet, S.F., Seregin, A.V., Yun, N.E., Poussard, A.L., Walker, A.G., de la Torre, J.C., Paessler, S., 2011.  
579 Rescue from Cloned cDNAs and In Vivo Characterization of Recombinant Pathogenic Romero  
580 and Live-Attenuated Candid #1 Strains of Junin Virus, the Causative Agent of Argentine  
581 Hemorrhagic Fever Disease. *J. Virol.* 85, 1473–1483. <https://doi.org/10.1128/JVI.02102-10>

- 582 Enria, D.A., Briggiler, A.M., Sánchez, Z., 2008. Treatment of Argentine hemorrhagic fever. *Antiviral*  
583 *Res.*, Special Issue: Treatment of highly pathogenic RNA viral infections 78, 132–139.  
584 <https://doi.org/10.1016/j.antiviral.2007.10.010>
- 585 Espy, N., Nagle, E., Pfeffer, B., Garcia, K., Chitty, A.J., Wiley, M., Sanchez-Lockhart, M., Bavari, S.,  
586 Warren, T., Palacios, G., 2019. T-705 induces lethal mutagenesis in Ebola and Marburg  
587 populations in macaques. *Antiviral Res.* 170, 104529.  
588 <https://doi.org/10.1016/j.antiviral.2019.06.001>
- 589 Feld, J.J., Hoofnagle, J.H., 2005. Mechanism of action of interferon and ribavirin in treatment of  
590 hepatitis C. *Nature* 436, 967–972. <https://doi.org/10.1038/nature04082>
- 591 Furuta, Y., Takahashi, K., Kuno-Maekawa, M., Sangawa, H., Uehara, S., Kozaki, K., Nomura, N., Egawa,  
592 H., Shiraki, K., 2005. Mechanism of action of T-705 against influenza virus. *Antimicrob.*  
593 *Agents Chemother.* 49, 981–986. <https://doi.org/10.1128/AAC.49.3.981-986.2005>
- 594 Goldhill, D.H., Langat, P., Xie, H., Galiano, M., Miah, S., Kellam, P., Zambon, M., Lackenby, A., Barclay,  
595 W.S., 2018a. Determining the Mutation Bias of Favipiravir in Influenza Virus Using Next-  
596 Generation Sequencing. *J. Virol.* 93, e01217-18, /jvi/93/2/JVI.01217-18.atom.  
597 <https://doi.org/10.1128/JVI.01217-18>
- 598 Goldhill, D.H., Velthuis, A.J.W. te, Fletcher, R.A., Langat, P., Zambon, M., Lackenby, A., Barclay, W.S.,  
599 2018b. The mechanism of resistance to favipiravir in influenza. *Proc. Natl. Acad. Sci.* 115,  
600 11613–11618. <https://doi.org/10.1073/pnas.1811345115>
- 601 Gowen, B.B., Hickerson, B.T., York, J., Westover, J.B., Sefing, E.J., Bailey, K.W., Wandersee, L.,  
602 Nunberg, J.H., 2021. Second-generation live-attenuated Candid#1 vaccine virus resists  
603 reversion and protects against lethal Junin virus infection in guinea pigs. *J. Virol.*  
604 <https://doi.org/10.1128/JVI.00397-21>
- 605 Gowen, B.B., Juelich, T.L., Sefing, E.J., Brasel, T., Smith, J.K., Zhang, L., Tigabu, B., Hill, T.E., Yun, T.,  
606 Pietzsch, C., Furuta, Y., Freiberg, A.N., 2013. Favipiravir (T-705) Inhibits Junin Virus Infection  
607 and Reduces Mortality in a Guinea Pig Model of Argentine Hemorrhagic Fever. *PLoS Negl.*  
608 *Trop. Dis.* 7, e2614. <https://doi.org/10.1371/journal.pntd.0002614>
- 609 Gowen, B.B., Westover, J.B., Sefing, E.J., Van Wettere, A.J., Bailey, K.W., Wandersee, L., Komono, T.,  
610 Furuta, Y., 2017. Enhanced protection against experimental Junin virus infection through the  
611 use of a modified favipiravir loading dose strategy. *Antiviral Res.* 145, 131–135.  
612 <https://doi.org/10.1016/j.antiviral.2017.07.019>
- 613 Gowen, B.B., Wong, M.-H., Jung, K.-H., Sanders, A.B., Mendenhall, M., Bailey, K.W., Furuta, Y.,  
614 Sidwell, R.W., 2007. In Vitro and In Vivo Activities of T-705 against Arenavirus and  
615 Bunyavirus Infections. *Antimicrob. Agents Chemother.* 51, 3168–3176.  
616 <https://doi.org/10.1128/AAC.00356-07>
- 617 Grande-Pérez, A., Martin, V., Moreno, H., de la Torre, J.C., 2015. Arenavirus Quasispecies and Their  
618 Biological Implications. *Quasispecies Theory Exp. Syst.* 392, 231–275.  
619 [https://doi.org/10.1007/82\\_2015\\_468](https://doi.org/10.1007/82_2015_468)
- 620 Guedj, J., Piorkowski, G., Jacquot, F., Madelain, V., Nguyen, T.H.T., Rodallec, A., Gunther, S.,  
621 Carbonnelle, C., Mentré, F., Raoul, H., Lamballerie, X. de, 2018. Antiviral efficacy of  
622 favipiravir against Ebola virus: A translational study in cynomolgus macaques. *PLOS Med.* 15,  
623 e1002535. <https://doi.org/10.1371/journal.pmed.1002535>
- 624 Ianevski, A., Giri, A.K., Aittokallio, T., 2020. SynergyFinder 2.0: visual analytics of multi-drug  
625 combination synergies. *Nucleic Acids Res.* 48, W488–W493.  
626 <https://doi.org/10.1093/nar/gkaa216>
- 627 Imamura, K., Sakurai, Y., Enami, T., Shibukawa, R., Nishi, Y., Ohta, A., Shu, T., Kawaguchi, J., Okada,  
628 S., Hoenen, T., Yasuda, J., Inoue, H., 2021. iPSC screening for drug repurposing identifies  
629 anti-RNA virus agents modulating host cell susceptibility. *FEBS Open Bio* 11, 1452–1464.  
630 <https://doi.org/10.1002/2211-5463.13153>

- 631 Kenyon, R.H., Canonico, P.G., Green, D.E., Peters, C.J., 1986. Effect of ribavirin and tributylribavirin  
632 on argentine hemorrhagic fever (Junin virus) in guinea pigs. *Antimicrob. Agents Chemother.*  
633 29, 521–523. <https://doi.org/10.1128/AAC.29.3.521>
- 634 Kurosaki, Y., Ueda, M.T., Nakano, Y., Yasuda, J., Koyanagi, Y., Sato, K., Nakagawa, S., 2018. Different  
635 effects of two mutations on the infectivity of Ebola virus glycoprotein in nine mammalian  
636 species. *J. Gen. Virol.* 99, 181–186. <https://doi.org/10.1099/jgv.0.000999>
- 637 Lingas, G., Rosenke, K., Safronetz, D., Guedj, J., 2021. Lassa viral dynamics in non-human primates  
638 treated with favipiravir or ribavirin. *PLOS Comput. Biol.* 17, e1008535.  
639 <https://doi.org/10.1371/journal.pcbi.1008535>
- 640 Lo, M.K., Albariño, C.G., Perry, J.K., Chang, S., Tchesnokov, E.P., Guerrero, L., Chakrabarti, A.,  
641 Shrivastava-Ranjan, P., Chatterjee, P., McMullan, L.K., Martin, R., Jordan, R., Götte, M.,  
642 Montgomery, J.M., Nichol, S.T., Flint, M., Porter, D., Spiropoulou, C.F., 2020. Remdesivir  
643 targets a structurally analogous region of the Ebola virus and SARS-CoV-2 polymerases. *Proc.*  
644 *Natl. Acad. Sci.* 117, 26946–26954. <https://doi.org/10.1073/pnas.2012294117>
- 645 Madelain, V., Guedj, J., Mentré, F., Nguyen, T.H.T., Jacquot, F., Oestereich, L., Kadota, T., Yamada, K.,  
646 Taburet, A.-M., Lamballerie, X. de, Raoul, H., 2017. Favipiravir Pharmacokinetics in  
647 Nonhuman Primates and Insights for Future Efficacy Studies of Hemorrhagic Fever Viruses.  
648 *Antimicrob. Agents Chemother.* 61. <https://doi.org/10.1128/AAC.01305-16>
- 649 McKee, K.T., Huggins, J.W., Trahan, C.J., Mahlandt, B.G., 1988. Ribavirin prophylaxis and therapy for  
650 experimental argentine hemorrhagic fever. *Antimicrob. Agents Chemother.* 32, 1304–1309.  
651 <https://doi.org/10.1128/AAC.32.9.1304>
- 652 McKee, K.T., Oro, J.G., Kuehne, A.I., Spisso, J.A., Mahlandt, B.G., 1993. Safety and immunogenicity of  
653 a live-attenuated Junin (Argentine hemorrhagic fever) vaccine in rhesus macaques. *Am. J.*  
654 *Trop. Med. Hyg.* 48, 403–411. <https://doi.org/10.4269/ajtmh.1993.48.403>
- 655 Mendenhall, M., Russell, A., Juelich, T., Messina, E.L., Smee, D.F., Freiberg, A.N., Holbrook, M.R.,  
656 Furuta, Y., de la Torre, J.-C., Nunberg, J.H., Gowen, B.B., 2011a. T-705 (Favipiravir) Inhibition  
657 of Arenavirus Replication in Cell Culture. *Antimicrob. Agents Chemother.* 55, 782–787.  
658 <https://doi.org/10.1128/AAC.01219-10>
- 659 Mendenhall, M., Russell, A., Smee, D.F., Hall, J.O., Skirpstunas, R., Furuta, Y., Gowen, B.B., 2011b.  
660 Effective Oral Favipiravir (T-705) Therapy Initiated after the Onset of Clinical Disease in a  
661 Model of Arenavirus Hemorrhagic Fever. *PLoS Negl. Trop. Dis.* 5, e1342.  
662 <https://doi.org/10.1371/journal.pntd.0001342>
- 663 Neagu, I.A., Olejarz, J., Freeman, M., Rosenbloom, D.I.S., Nowak, M.A., Hill, A.L., 2018. Life cycle  
664 synchronization is a viral drug resistance mechanism. *PLOS Comput. Biol.* 14, e1005947.  
665 <https://doi.org/10.1371/journal.pcbi.1005947>
- 666 Neumann, G., Watanabe, T., Ito, H., Watanabe, S., Goto, H., Gao, P., Hughes, M., Perez, D.R., Donis,  
667 R., Hoffmann, E., Hobom, G., Kawaoka, Y., 1999. Generation of influenza A viruses entirely  
668 from cloned cDNAs. *Proc. Natl. Acad. Sci.* 96, 9345–9350.  
669 <https://doi.org/10.1073/pnas.96.16.9345>
- 670 NIAID Emerging Infectious Diseases/Pathogens | NIH: National Institute of Allergy and Infectious  
671 Diseases [WWW Document], n.d. URL [https://www.niaid.nih.gov/research/emerging-](https://www.niaid.nih.gov/research/emerging-infectious-diseases-pathogens)  
672 [infectious-diseases-pathogens](https://www.niaid.nih.gov/research/emerging-infectious-diseases-pathogens) (accessed 11.24.18).
- 673 Pauly, M.D., Lauring, A.S., 2015. Effective Lethal Mutagenesis of Influenza Virus by Three Nucleoside  
674 Analogs. *J. Virol.* 89, 3584–3597. <https://doi.org/10.1128/JVI.03483-14>
- 675 Pemba, C.M., Kurosaki, Y., Yoshikawa, R., Oloniniyi, O.K., Urata, S., Sueyoshi, M., Zadeh, V.R.,  
676 Nwafor, I., Iroezindu, M.O., Ajayi, N.A., Chukwubike, C.M., Chika-Igwenyi, N.M., Ndu, A.C.,  
677 Nwidi, D.U., Maehira, Y., Unigwe, U.S., Ojide, C.K., Onwe, E.O., Yasuda, J., 2019.  
678 Development of an RT-LAMP assay for the detection of Lassa viruses in southeast and south-  
679 central Nigeria. *J. Virol. Methods* 269, 30–37.  
680 <https://doi.org/10.1016/j.jviromet.2019.04.010>

- 681 Peng, R., Xu, X., Jing, J., Wang, M., Peng, Q., Liu, S., Wu, Y., Bao, X., Wang, P., Qi, J., Gao, G.F., Shi, Y.,  
682 2020. Structural insight into arenavirus replication machinery. *Nature* 579, 615–619.  
683 <https://doi.org/10.1038/s41586-020-2114-2>
- 684 Pfeiffer, J.K., Kirkegaard, K., 2005. Increased Fidelity Reduces Poliovirus Fitness and Virulence under  
685 Selective Pressure in Mice. *PLOS Pathog.* 1, e11.  
686 <https://doi.org/10.1371/journal.ppat.0010011>
- 687 Pfeiffer, J.K., Kirkegaard, K., 2003. A single mutation in poliovirus RNA-dependent RNA polymerase  
688 confers resistance to mutagenic nucleotide analogs via increased fidelity. *Proc. Natl. Acad. Sci.*  
689 100, 7289–7294. <https://doi.org/10.1073/pnas.1232294100>
- 690 Rosenke, K., Feldmann, H., Westover, J.B., Hanley, P.W., Martellaro, C., Feldmann, F., Saturday, G.,  
691 Lovaglio, J., Scott, D.P., Furuta, Y., Komeno, T., Gowen, B.B., Safronetz, D., 2018. Use of  
692 Favipiravir to Treat Lassa Virus Infection in Macaques. *Emerg. Infect. Dis.* 24, 1696–1699.  
693 <https://doi.org/10.3201/eid2409.180233>
- 694 Sadeghipour, S., Bek, E.J., McMinn, P.C., 2013. Ribavirin-Resistant Mutants of Human Enterovirus 71  
695 Express a High Replication Fidelity Phenotype during Growth in Cell Culture. *J. Virol.* 87, 11.
- 696 Sedaghat, A.R., Wilke, C.O., 2011. Kinetics of the viral cycle influence pharmacodynamics of  
697 antiretroviral therapy. *Biol. Direct* 6, 42. <https://doi.org/10.1186/1745-6150-6-42>
- 698 Stephan, B.I., Lozano, M.E., Goñi, S.E., 2013. Watching Every Step of the Way: Junín Virus  
699 Attenuation Markers in the Vaccine Lineage. *Curr. Genomics* 14, 415–424.  
700 <https://doi.org/10.2174/138920291407131220153526>
- 701 Suemori, K., Saijo, M., Yamanaka, A., Himeji, D., Kawamura, M., Haku, T., Hidaka, M., Kamikokuryo,  
702 C., Kakihana, Y., Azuma, T., Takenaka, K., Takahashi, T., Furumoto, A., Ishimaru, T., Ishida, M.,  
703 Kaneko, M., Kadowaki, N., Ikeda, K., Sakabe, S., Taniguchi, T., Ohge, H., Kurosu, T.,  
704 Yoshikawa, T., Shimojima, M., Yasukawa, M., 2021. A multicenter non-randomized,  
705 uncontrolled single arm trial for evaluation of the efficacy and the safety of the treatment  
706 with favipiravir for patients with severe fever with thrombocytopenia syndrome. *PLoS Negl.*  
707 *Trop. Dis.* 15, e0009103. <https://doi.org/10.1371/journal.pntd.0009103>
- 708 Szemiel, A.M., Merits, A., Orton, R.J., MacLean, O., Pinto, R.M., Wickenhagen, A., Lieber, G., Turnbull,  
709 M.L., Wang, S., Mair, D., Filipe, A. da S., Willett, B.J., Wilson, S.J., Patel, A.H., Thomson, E.C.,  
710 Palmarini, M., Kohl, A., Stewart, M.E., 2021. In vitro evolution of Remdesivir resistance  
711 reveals genome plasticity of SARS-CoV-2. *bioRxiv* 2021.02.01.429199.  
712 <https://doi.org/10.1101/2021.02.01.429199>
- 713 Tchesnokov, E.P., Gordon, C.J., Woolner, E., Kocincova, D., Perry, J.K., Feng, J.Y., Porter, D.P., Gotte,  
714 M., 2020. Template-dependent inhibition of coronavirus RNA-dependent RNA polymerase  
715 by remdesivir reveals a second mechanism of action. *J. Biol. Chem.*  
716 <https://doi.org/10.1074/jbc.AC120.015720>
- 717 Urata, S., Yasuda, J., 2012. Molecular Mechanism of Arenavirus Assembly and Budding. *Viruses* 4,  
718 2049–2079. <https://doi.org/10.3390/v4102049>
- 719 Ushijima, Y., Abe, H., Ozeki, T., Ondo, G.N., Mbadinga, M.J.V.M., Bikangui, R., Nze-Nkogue, C.,  
720 Akomo-Okoue, E.F., Ella, G.W.E., Koumba, L.B.M., Nso, B.C.B.B., Mintsa-Nguema, R.,  
721 Makouloutou-Nzassi, P., Makanga, B.K., Nguelet, F.L.M., Zadeh, V.R., Urata, S., Mbouna,  
722 A.V.N., Loembe, M.M., Agnandji, S.T., Lell, B., Yasuda, J., 2021. Identification of potential  
723 novel hosts and the risk of infection of lymphocytic choriomeningitis virus in humans in  
724 Gabon, Central Africa. *Int. J. Infect. Dis.* <https://doi.org/10.1016/j.ijid.2021.02.105>
- 725 Veliziotis, I., Roman, A., Martiny, D., Schuldt, G., Claus, M., Dauby, N., Wijngaert, S.V. den, Martin, C.,  
726 Nasreddine, R., Perandones, C., Mahieu, R., Swaan, C., Praet, S.V., Konopnicki, D., Morales,  
727 M.A., Malvy, D., Stevens, E., Dechamps, P., Vlieghe, E., Vandenberg, O., Günther, S., Gérard,  
728 M., n.d. Clinical Management of Argentine Hemorrhagic Fever using Ribavirin and  
729 Favipiravir, Belgium, 2020 - Volume 26, Number 7—July 2020 - *Emerging Infectious Diseases*  
730 *journal - CDC.* <https://doi.org/10.3201/eid2607.200275>

- 731 Vignuzzi, M., Stone, J.K., Arnold, J.J., Cameron, C.E., Andino, R., 2006. Quasispecies diversity  
732 determines pathogenesis through cooperative interactions in a viral population. *Nature* 439,  
733 344–348. <https://doi.org/10.1038/nature04388>
- 734 Wang, Y., Li, G., Yuan, S., Gao, Q., Lan, K., Altmeyer, R., Zou, G., 2016. In Vitro Assessment of  
735 Combinations of Enterovirus Inhibitors against Enterovirus 71. *Antimicrob. Agents*  
736 *Chemother.* 60, 5357–5367. <https://doi.org/10.1128/AAC.01073-16>
- 737 Weissenbacher, M.C., Calello, M.A., Merani, M.S., Rodriguez, M., McCormick, J.B., 1986. Therapeutic  
738 Effect of the Antiviral Agent Ribavirin in Junin Virus Infection of Primates. *J. Med. Virol.* 20,  
739 261–267. <https://doi.org/10.1002/jmv.1890200308>
- 740 Westover, J.B., Sefing, E.J., Bailey, K.W., Van Wettere, A.J., Jung, K.-H., Dagley, A., Wandersee, L.,  
741 Downs, B., Smees, D.F., Furuta, Y., Bray, M., Gowen, B.B., 2016. Low-dose ribavirin  
742 potentiates the antiviral activity of favipiravir against hemorrhagic fever viruses. *Antiviral*  
743 *Res.* 126, 62–68. <https://doi.org/10.1016/j.antiviral.2015.12.006>
- 744 Zadeh, V.R., Urata, S., Sakaguchi, M., Yasuda, J., 2020. Human BST-2/tetherin inhibits Junin virus  
745 release from host cells and its inhibition is partially counteracted by viral nucleoprotein. *J.*  
746 *Gen. Virol.* <https://doi.org/10.1099/jgv.0.001414>
- 747 Ziegler, C.M., Botten, J.W., 2020. Defective Interfering Particles of Negative-Strand RNA Viruses.  
748 *Trends Microbiol.* 28, 554–565. <https://doi.org/10.1016/j.tim.2020.02.006>
- 749

750 **FIGURE LEGENDS**

751 **Figure 1. Emergence of favipiravir resistant JUNV by sequential passaging in 293T cells.**

752 (A) Serial passage of JUNV in presence of moderate favipiravir concentrations. JUNV was  
753 passaged in 293T cells (MOI: 0.01) in presence of 5  $\mu$ M for the first three passages and 20  $\mu$ M  
754 favipiravir for the remaining passages. After a total of 11 passages, a resistant JUNV population  
755 emerged (gray). Control passages were performed in parallel using DMSO (black), n = 1. (B)  
756 Favipiravir dose-response analysis. 293T cell were infected with JUNV Candid #1 parental  
757 (P0) or passage 11 (P11) viral populations (MOI: 0.1), After adsorption, media containing  
758 indicated concentrations of favipiravir was added to the cells. At 48 hpi., viral titers were  
759 measured by plaque assay. Error bars indicate  $\pm$ SD; three independent experiments in duplicate  
760 (n = 6) were performed; nonlinear regression analysis was applied; LOD, limit of detection.

761

762 **Figure 2. Nucleic acid substitutions in RdRp and GPC open reading frames.**

763 Representative chromatograms of mutations of favipiravir resistant JUNV Candid #1, passage  
764 11 (P11) are shown in comparison to the parental virus population (P0). Amino acid residues  
765 are shown below each codon. Arrows indicate mutation locations.

766

767 **Figure 3. JUNV Candid #1-mutant virus replication begins at earlier time point. To**

768 determine the one-step growth kinetics of favipiravir resistant JUNV, 293T cell were infected  
769 with either Candid #1 or Candid #1-mutant (MOI: 0.1). In order to synchronize infection, cells  
770 were incubated on ice for 30 minutes. Cells were then washed with PBS (-) and pre-warmed  
771 DMEM containing 10% FBS was added. Supernatant was collected at the indicated time points.  
772 Titers were determined by plaque assay. Error bars indicate  $\pm$ SD, three independent

773 experiments in duplicates ( $n = 6$ ) were performed. Statistical significance was determined by  
774 2-way ANOVA test ( $P < 0.0001$ ).

775

776 **Figure 4. Mutational frequencies of virus populations in presence of 20  $\mu$ M favipiravir or**  
777 **DMSO control.** Clonal sequencing targeting 450 bp of nucleoprotein (NP) gene was  
778 performed (as described in materials and methods) to estimate the frequency of mutations in  
779 each virion population. Nucleotide polymorphisms were counted for Candid #1 and Candid  
780 #1-res viruses to estimate the proportions of transition (shown in bold) and transversion  
781 substitutions in presence of 20  $\mu$ M favipiravir.

782

783 **Figure 5. Infectivity of Candid #1 and Candid #1-res viruses.** 293T cells were infected with  
784 each virus (MOI: 0.01) and treated with different concentrations of favipiravir or DMSO  
785 Specific infectivity values at 48 hpi, were calculated using the ratio of infectious particles  
786 ( $\text{Log}_{10}$  PFU/mL) to the RNA copy numbers ( $\text{Log}_{10}$  copies/mL). Values were normalized to  
787 DMSO-treated controls. Error bars indicate  $\pm$ SD; two independent experiments in duplicates  
788 ( $n = 8$ ) were performed. Statistical significance was determined by 2-way ANOVA test (\*\*  
789 indicates  $P < 0.01$  and \*\*\* indicates  $P < 0.001$ ).

790

791 **Figure 6. GPC-A168T substitution enhances viral entry dynamics.** (A) 293T cells were  
792 infected with Candid#1pv-A168 or Candid#1pv-T168 virus at 4 °C to allow synchronized  
793 attachment. Unbound viral particles were removed and internalization was initiated by  
794 transferring the cells to 37 °C. Luciferase signal was measured at indicated time points. Signal  
795 at 24 hours was considered 100%. (B) Western blot analysis (anti-VSV-M in the upper panel  
796 for the detection of the VSV-M protein, and Anti- $\beta$ -Actin as loading control) to assess fusion

797 efficiency of pseudotyped viruses (C) Expression levels of intracellular M protein was  
798 normalized to the input virus. Quantified results of two independent experiments ( $n = 6$ ) are  
799 shown. The bar indicates  $\pm$ SD. Statistical significance was determined using multiple  $t$ -tests  
800 (\*\* indicates  $P < 0.01$ ).

801

802 **Figure 7. Effect of RdRp-N462D substitution on polymerase activity.** (A) Schematic  
803 representation of the minigenome (MG) plasmid constructs with a nluc reporter (B) Western  
804 blot analysis (anti-Flag; upper panel for the detection RdRp-N462 or RdRp-D462 protein. Anti-  
805  $\beta$ -Actin; loading control) to ensure equal expression levels (C) Polymerase activities measured  
806 using the MG system in 293T cells at 48 hpt. Results are expressed by the ratio of nano  
807 luciferase to renilla luciferase activity (internal control). Quantified results of two independent  
808 experiments ( $n = 6$ ) are shown. The bar indicates  $\pm$ SD. Statistical significance was determined  
809 using  $t$ -tests (\*\* indicates  $P < 0.01$ . ns indicates not significant). (D) Sensitivity of RdRp-N462  
810 and RdRp-D462 polymerases were compared using the MG system. Quantified results of two  
811 independent experiments ( $n = 6$ ) are shown. (E) Cell viability assay as described in materials  
812 and methods. (F) Quantification of nLuc mRNA from a minigenome assay by qPCR.  
813  $\Delta\Delta$ CT was calculated using *GAPDH* as described in the materials and methods. Fold change  
814 in mRNA was normalized to DMSO-treated controls. Error bars indicate  $\pm$ SD; two  
815 independent experiments in duplicates ( $n = 6$ ) were performed. Statistical significance was  
816 determined using a 2-way ANOVA test (\*\*\*) indicates  $P < 0.001$ ).

817

818 **Figure 8. Combination inhibitory effect of favipiravir and ribavirin or remdesivir on**  
819 **JUNV.** 293T were infected with JUNV (MOI, 0.1) and subsequently treated with a  $6 \times 6$  drug  
820 combination matrix of favipiravir + ribavirin (A) or favipiravir + remdesivir (B) Dose-response



821 matrix and synergy heat map are presented. Colored bar indicates strength of synergy ( $\delta$ -score);  
822 less than  $-10$  is likely to be antagonistic,  $-10$  to  $10$  suggests an additive drug interaction, larger  
823 than  $10$  indicates a synergistic effect. Data are means of two independent experiments in  
824 duplicates ( $n = 4$ ).

825

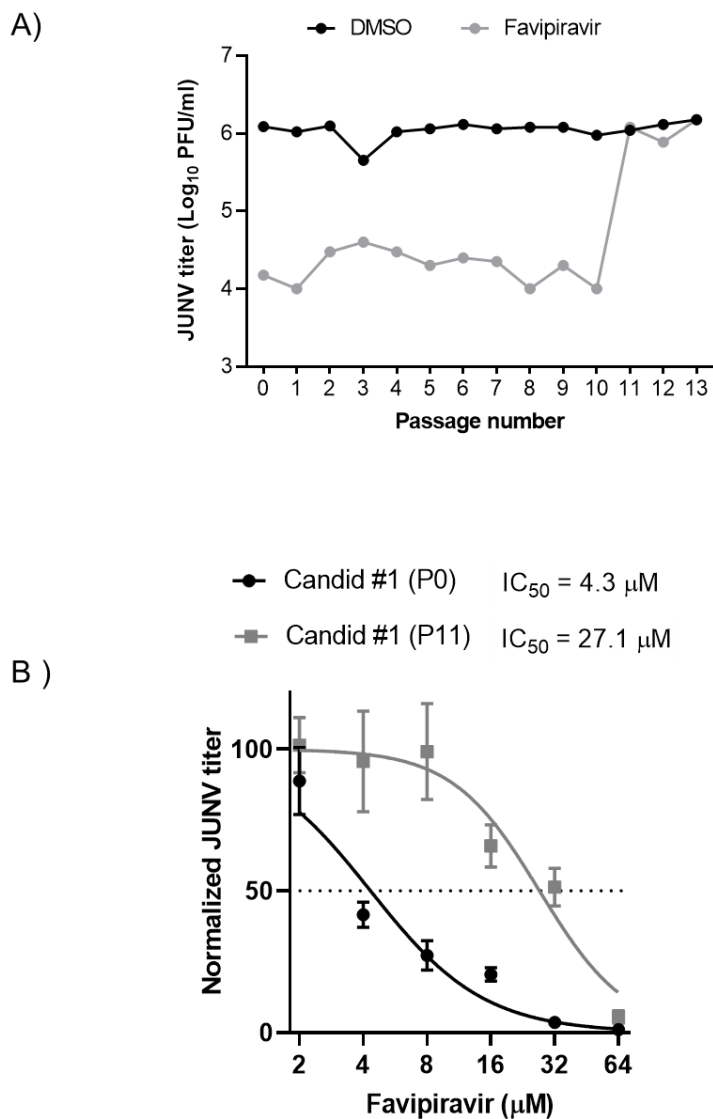

Figure 1. Zadeh *et al.*

826

827

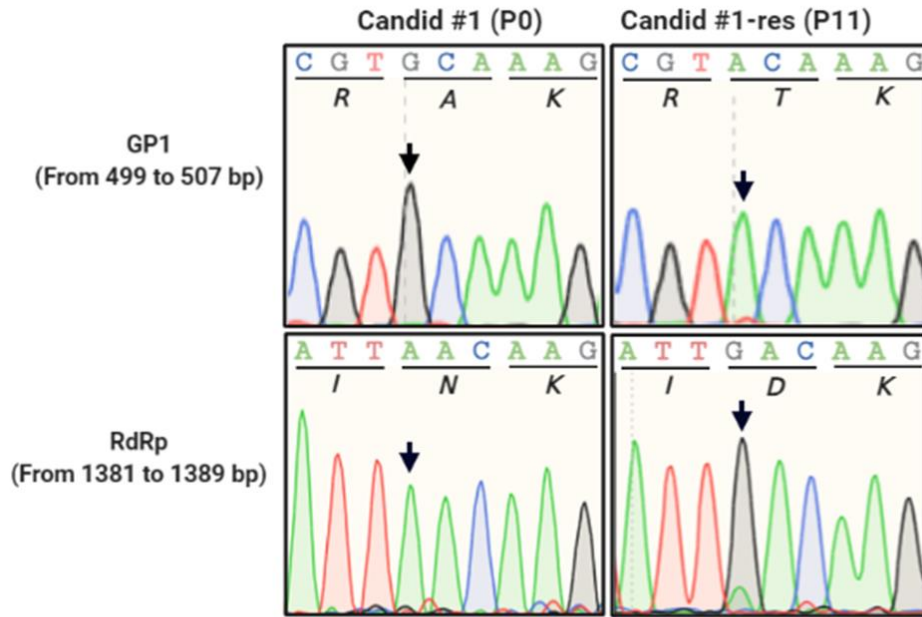

Figure 2. Zadeh *et al.*

828

829

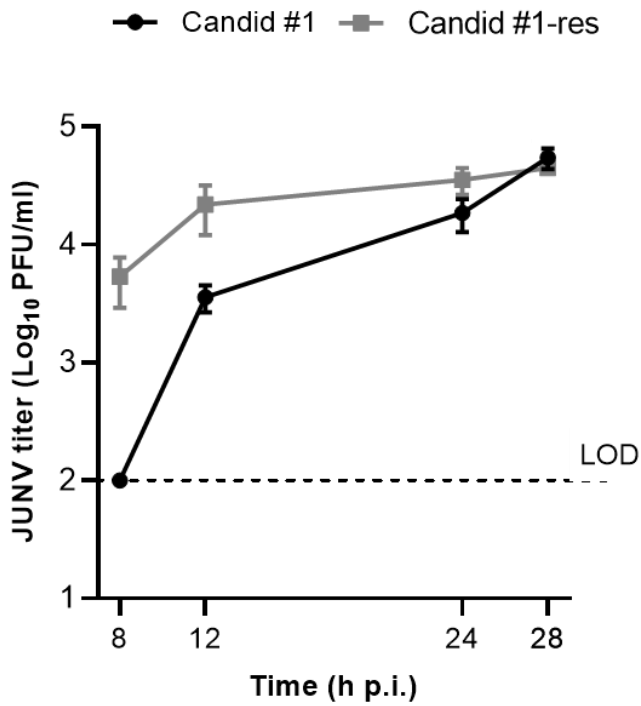

Figure 3. Zadeh *et al.*

830

831

|             |   | Candid #1 (P0)                                   |   |   |   |   | Candid #1-res (P11)                             |   |   |   |   |
|-------------|---|--------------------------------------------------|---|---|---|---|-------------------------------------------------|---|---|---|---|
|             |   | ↗                                                | A | T | C | G | ↗                                               | A | T | C | G |
| DMSO        | A |                                                  |   | 0 | 0 | 0 |                                                 |   | 0 | 0 | 0 |
|             | T | 3                                                |   |   | 0 | 0 | 0                                               |   |   | 0 | 0 |
|             | C | 0                                                | 0 |   |   | 0 | 0                                               | 0 |   |   | 0 |
|             | G | 2                                                | 0 | 0 |   |   | 1                                               | 1 | 0 |   |   |
|             |   | Total nucleotides: 26,100<br>Total mutations: 5  |   |   |   |   | Total nucleotides: 34,200<br>Total mutations: 2 |   |   |   |   |
| Favipiravir | A |                                                  |   | 1 | 0 | 4 |                                                 |   | 0 | 1 | 0 |
|             | T | 1                                                |   |   | 4 | 2 | 0                                               |   |   | 1 | 1 |
|             | C | 0                                                | 1 |   |   | 0 | 0                                               | 0 |   |   | 0 |
|             | G | 8                                                | 0 | 0 |   |   | 2                                               | 0 | 0 |   |   |
|             |   | Total nucleotides: 24,300<br>Total mutations: 21 |   |   |   |   | Total nucleotides: 27,450<br>Total mutations: 5 |   |   |   |   |

Figure 4. Zadeh *et al.*

832

833

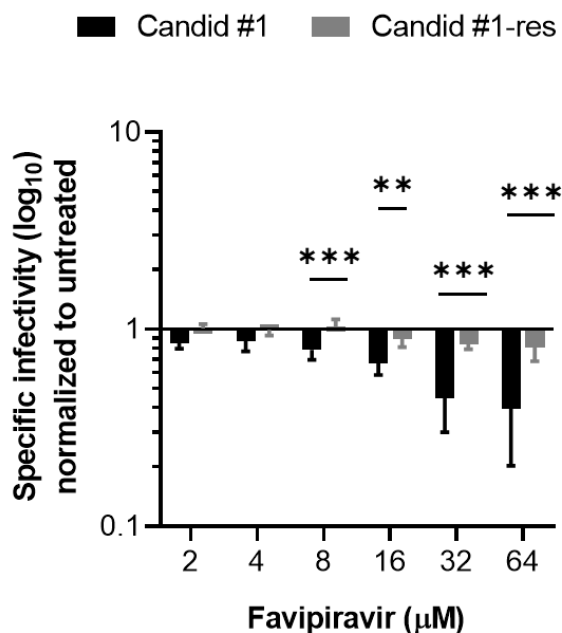

Figure 5. Zadeh *et al.*

834

835

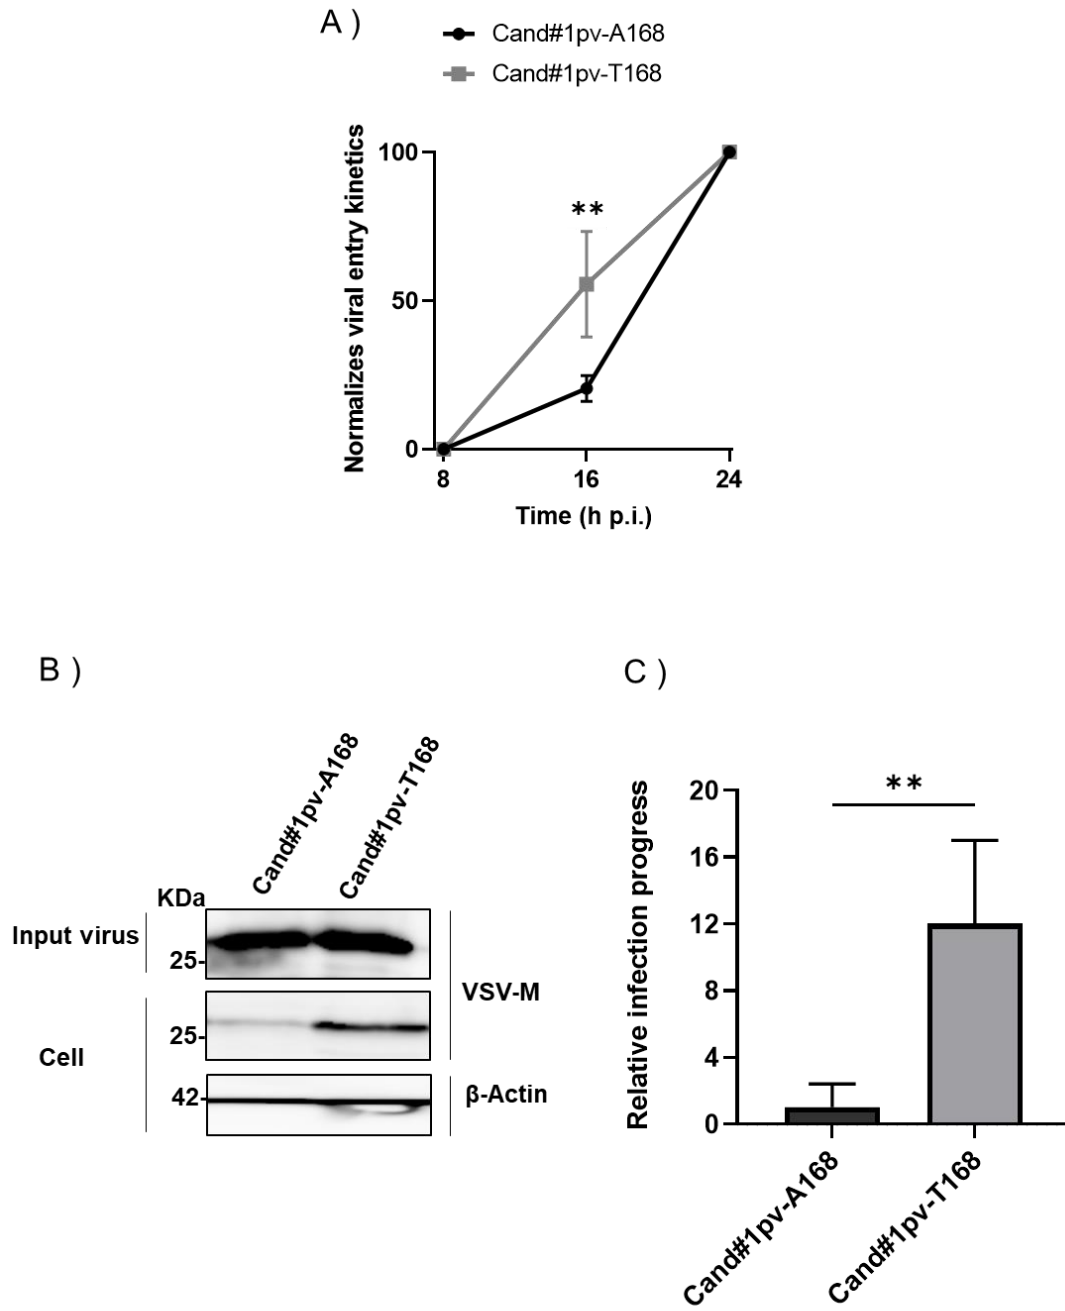

Figure 6. Zadeh *et al.*

836

837

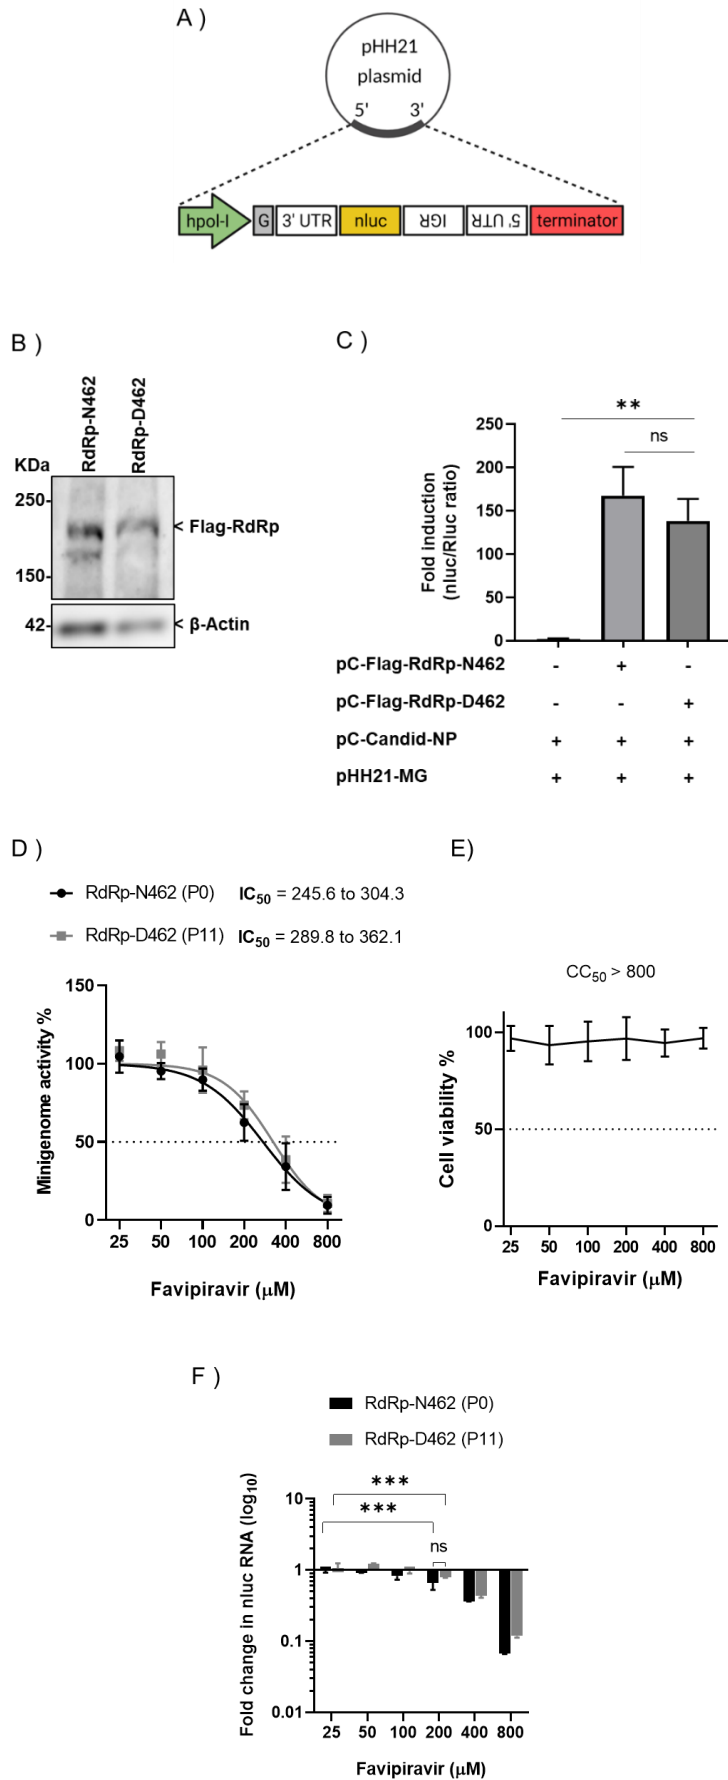

838

839

Figure 7. Zadeh *et al.*

840

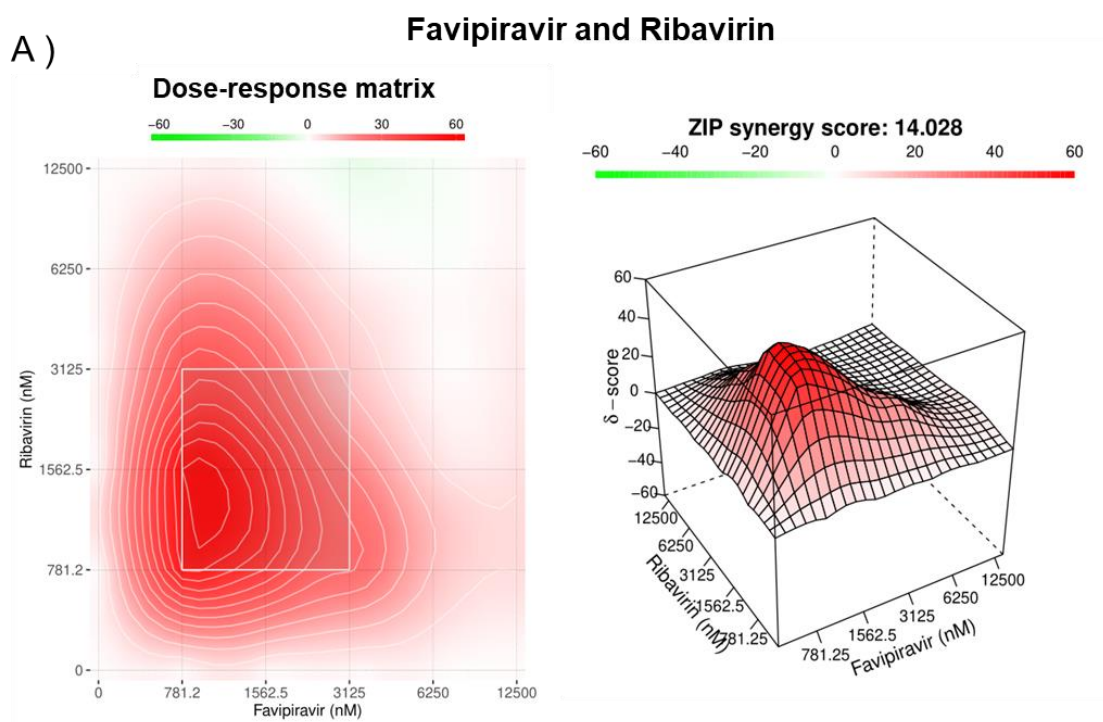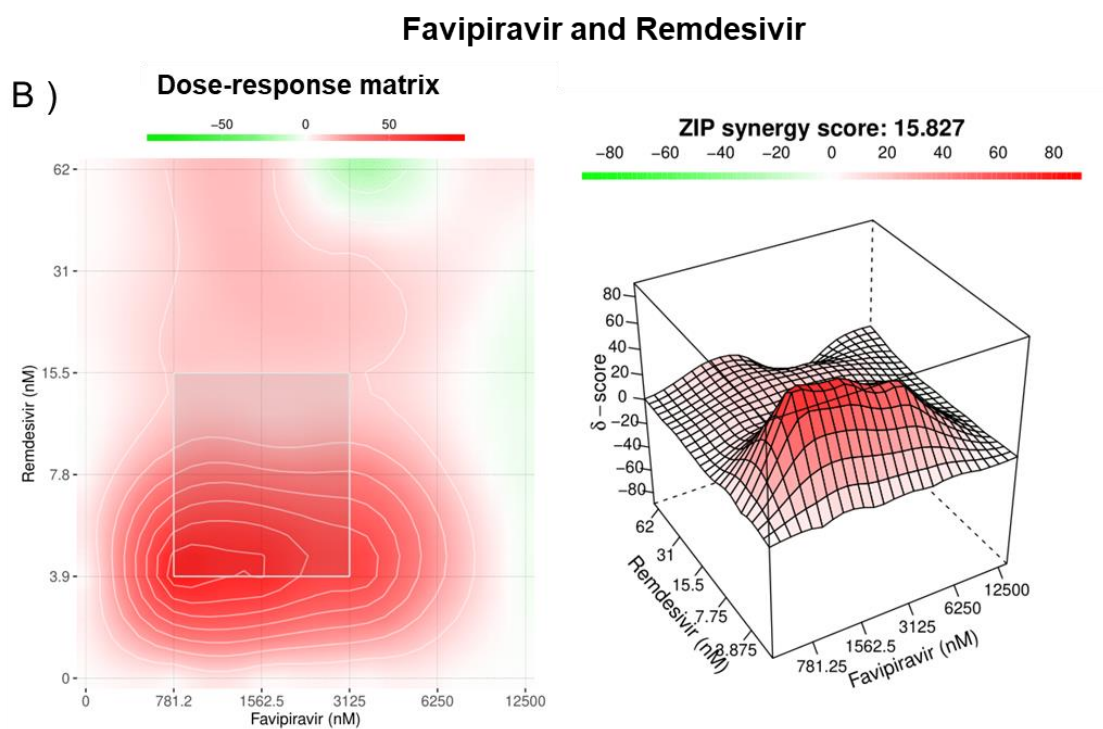

Figure 8. Zadeh *et al.*

841

842

843

844

845 **Table S1. Primer list used for sequencing of JUNV genome L and S segments.**

| Primer Name            | Position |      | Sequence (5' to 3')        |
|------------------------|----------|------|----------------------------|
|                        | Start    | End  |                            |
| L-1 F                  | 6        | 28   | GGGGATCCTAGGCGTTACTTCA     |
| L-1 R                  | 889      | 867  | GCATATGACCTCATTGGGCCAG     |
| L-2 F                  | 743      | 765  | TCCTCTAGTGCTCCAATTGCCT     |
| L-2 R                  | 1664     | 1642 | CGCTTCAGCCCATGTTAGACAG     |
| L-3 F                  | 1509     | 1534 | ACCAAAGAAGGATTTGAGACACGA   |
| L-3 R                  | 2424     | 2402 | TTGGGGACTTGAGGTTGGTCTT     |
| L-4 F                  | 2279     | 2301 | TCTGCCAAGATCTTCTTCACGC     |
| L-4 R                  | 3106     | 3084 | AGCGATGACCAGGTTAGCCTTA     |
| L-5 F                  | 2959     | 2982 | TCCTATCACACTCTTTGGGCTGA    |
| <b>Segment-L</b> L-5 R | 3829     | 3807 | ACAAATGCAGCCCTACGGAATT     |
| L-6 F                  | 3668     | 3690 | AGCTTAGTGTTGAGGTCTCCCA     |
| L-6 R                  | 4557     | 4534 | GCGTTTCTACTATGGCTGAGAGG    |
| L-7 F                  | 4374     | 4396 | AGGCCCTTACTTGATCCTCTGT     |
| L-7 R                  | 5297     | 5275 | CCGGTTGGATTTTAGCCACGAA     |
| L-8 F                  | 5147     | 5173 | TGGATTTGATTTGCATATGCCATCAA |
| L-8 R                  | 5957     | 5935 | TGCGGGAATAGTTGTTGGACAA     |
| L-9 F                  | 5795     | 5820 | TGTGACCAGAGATCTTGATGAGAGT  |
| L-9 R                  | 6688     | 6666 | GCAGGGATTACGTTGGTTCCTG     |
| L-10 F                 | 6203     | 6227 | ACATCCATCAACTTGTTTGCACAA   |
| L-10 R                 | 7095     | 7073 | GGCACTTGAGCATGGAGGAATC     |
| -----                  |          |      |                            |
| S-1 F                  | 8        | 30   | AGGGGATCCTAGGCGATTTTGG     |
| S-1 R                  | 878      | 856  | TGCCGGATGAGTCTGTCAAAGA     |
| S-2 F                  | 721      | 744  | CTGTGCTTAATGAAGGCACAACC    |
| S-2 R                  | 1544     | 1522 | AGTGTCTCTACGCCAACTGT       |
| <b>Segment-S</b> S-3 F | 1385     | 1407 | TCACAGCGTCACTCTTCCTTCA     |
| S-3 R                  | 2195     | 2173 | GACATTGAAGGACCAGCCACTG     |
| S-4 F                  | 2047     | 2070 | TGTCCTTCATTAAGATGCCGTGA    |
| S-4 R                  | 2953     | 2931 | ACTTGTCCCAGTCACAACCTTGC    |
| S-5 F                  | 2514     | 2537 | AGGGAAGAGAAGTTTTCTGGGGT    |
| S-5 R                  | 3325     | 3303 | ACTCCAAGGAGGTTCCAAGCTT     |

846

847

848

849

850 **Figure S1. Determination of favipiravir IC<sub>50</sub> value.** 293T cells were infected with Candid  
851 #1 (MOI: 0.1). After adsorption, media containing serial dilutions of favipiravir was added. At  
852 48 hpi, supernatant was collected and viral titers were determined by plaque assay. Error bars  
853 indicate  $\pm$ SD; three independent experiments in duplicates (n = 6) were performed; nonlinear  
854 regression analysis was applied.

855

856 **Figure S2. Nucleoside supplementation assay.** 293T cells infected with JUNV (MOI: 0.01).  
857 were treated with serial dilutions of nucleosides adenosine, guanosine, thymine, cytosine, and  
858 uracil in combination with 50  $\mu$ M of favipiravir. At 48 hpi, viral titers were measured by plaque  
859 assay. Titters were normalized to anti-JUNV activity of favipiravir to estimate the reversal  
860 imposed by nucleotide supplementations. Error bars indicate  $\pm$ SD; two independent  
861 experiments in duplicates (n = 6) were performed. Statistical significance was determined by  
862 2-way ANOVA tests (ns indicates not significant and \*\*\* indicates  $P < 0.001$ ).

863

864 **Figure S3. The amplification results of qPCR assay.** (A) The amplification plot for VSV-M  
865 detection from Candid #1pv-A168 (red) or Candid #1pv-T168 (blue) showing a CT value of  
866 27.99 and 27.95 are shown respectively. (B) Melting curve analysis at the end of the  
867 amplification run confirms the specificity of the assay at the end of the amplification.

868

869 **Figure S4. Serial passaging of JUNV treated with combination of favipiravir and**  
870 **ribavirin or remdesivir.** 293T cells were infected with JUNV at MOI of 0.01 for initial  
871 inoculation and 10-fold dilutions for the remaining passages (n = 3). After adsorption, cells  
872 were treated with combinations of favipiravir (0.3  $\mu$ M), ribavirin (0.3  $\mu$ M), and remdesivir (1  
873 nM), and titers were determined at 48 hpi by plaque assay.



874

875 **Figure S5. JUNV Candid #1-mutant virus remains susceptible to ribavirin and**

876 **remdesivir.** 293T cell were infected with JUNV Candid #1 or Candid #1-mutant virus (MOI:

877 0.1). Media containing the indicated concentrations of ribavirin was added. At 48 hpi, viral

878 titers were measured by plaques assay. Cytotoxicity assay was performed as described in

879 materials and methods. Error bars indicate  $\pm$ SD; three independent experiments in duplicate (n

880 = 6) were performed; nonlinear regression analysis was applied.

881

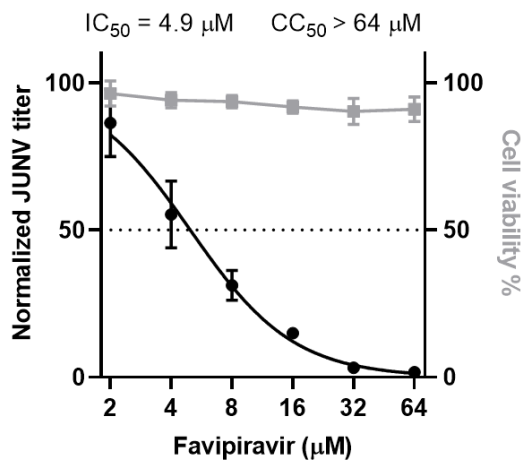

882

Figure S1. Zadeh *et al.*

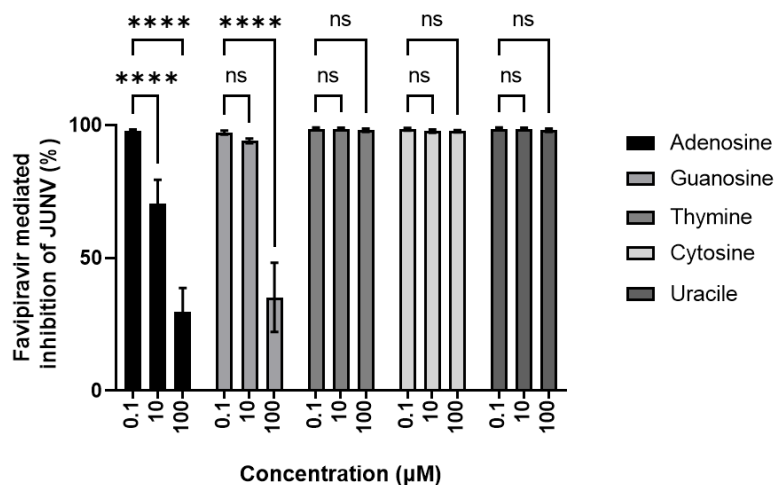

883

Figure S2. Zadeh *et al.*

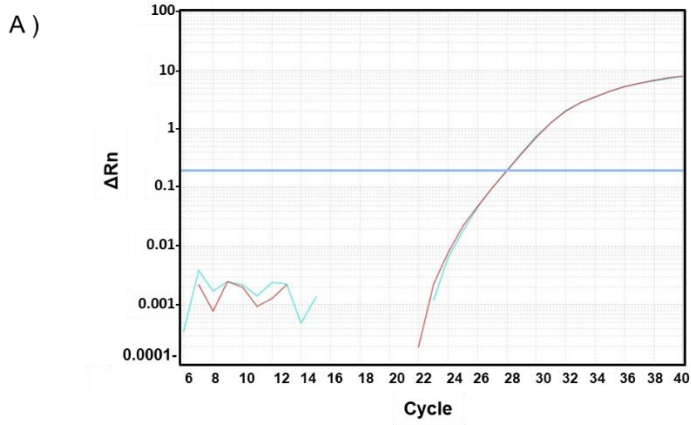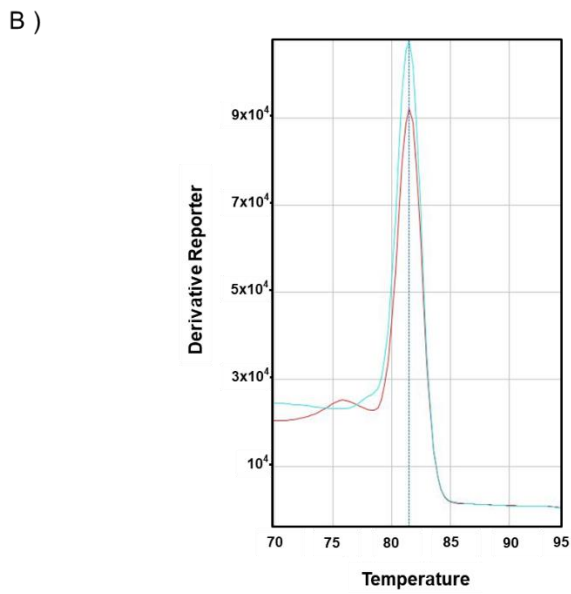

884 Figure S3. Zadeh *et al.*

885

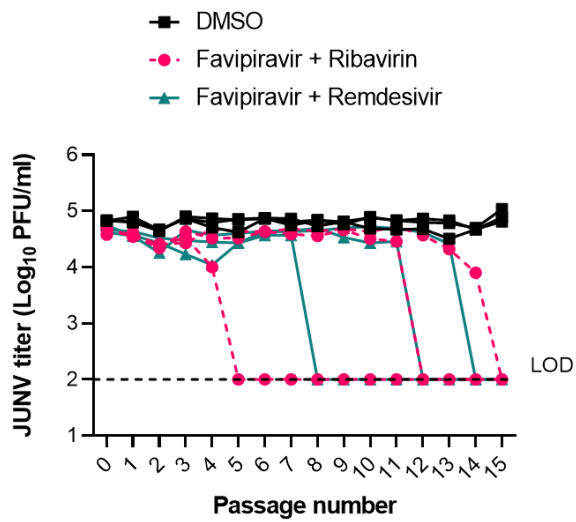

886 Figure S4. Zadeh *et al.*

887

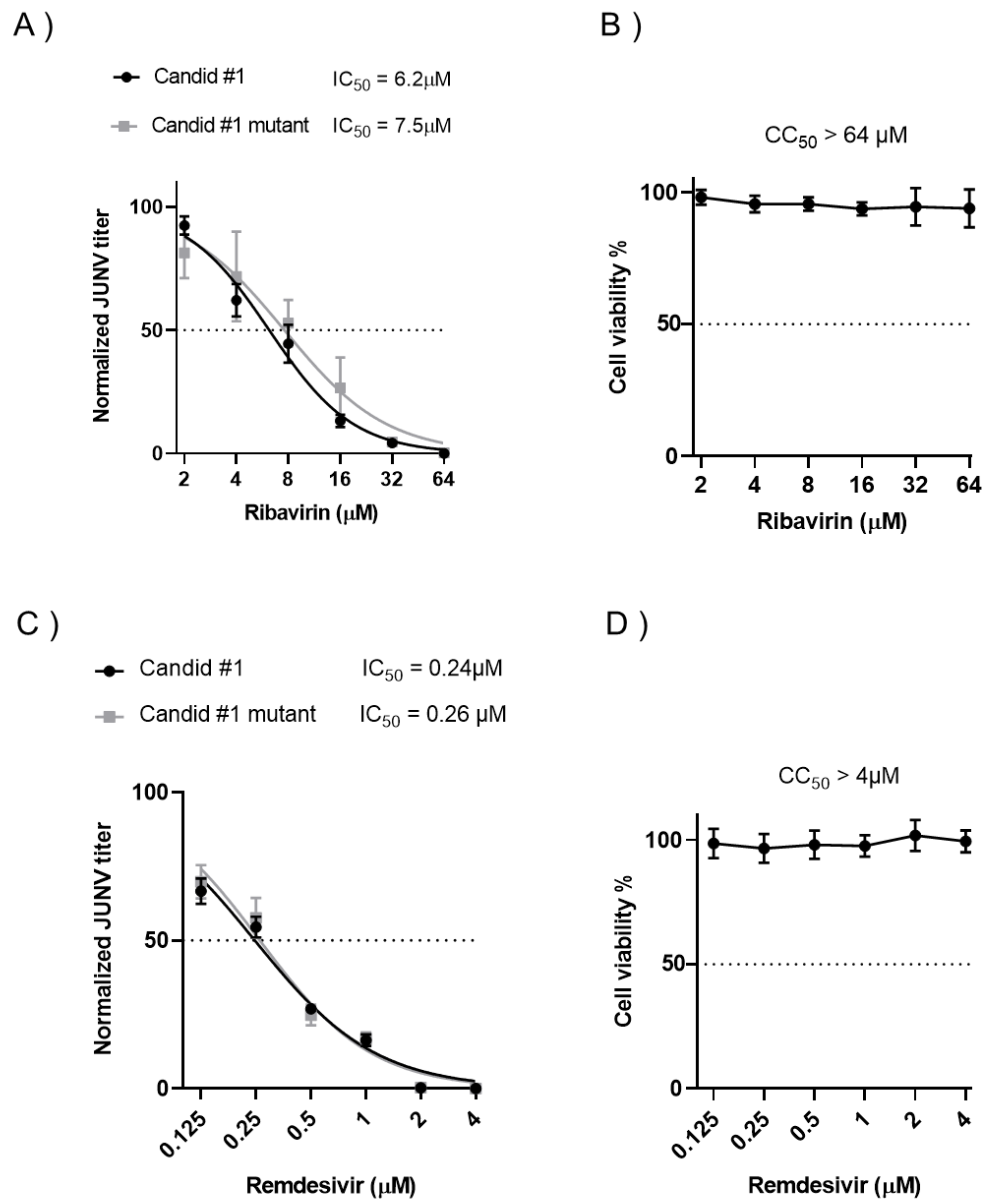

Figure S5. Zadeh *et al.*

888
